# Supplementary material for: Comparative mRNA and microRNA Expression Profiling of Three Genitourinary Cancers Reveals Common Hallmarks and Cancer-Specific Molecular Events
Source: PLoS One. 2011 Jul 25;6(7):e22570. doi: 10.1371/journal.pone.0022570 (PMC3143156; doi:10.1371/journal.pone.0022570)
Supplement: Table S4 — Biological process analysis of gene sets that were deregulated uniformly in all cancers or only in TCC, TGCT or ccRCC. (XLS) [file pone.0022570.s005.xls]

## Sheet: Table S4
Table S4. Biological process analysis of gene sets deregulated uniformly in all cancers or only in TCC, TGCT or ccRCC.
Gene seta	Biological process	Countb	%c	P-Value	P-Value adjusted by Benjamini	Genesd
BTK	GO:0051301~cell division	24	8.33333	4.04832e-10	6.80928e-07	5950, 221150, 4174, 890, 64151, 699, 29127, 113130, 3833, 1063, 64946, 54443, 9735, 3070, 9212, 11339, 9133, 83461, 5347, 701, 891, 9055, 1163, 259266
	GO:0007067~mitosis	21	7.29167	4.07924e-10	3.43064e-07	56992, 221150, 890, 64151, 699, 113130, 3833, 1063, 54443, 9735, 3070, 9212, 1663, 11339, 9133, 11004, 83461, 5347, 701, 891, 259266
	GO:0000280~nuclear division	21	7.29167	4.07924e-10	3.43064e-07	56992, 221150, 890, 64151, 699, 113130, 3833, 1063, 54443, 9735, 3070, 9212, 1663, 11339, 9133, 11004, 83461, 5347, 701, 891, 259266
	GO:0000087~M phase of mitotic cell cycle	21	7.29167	5.62053e-10	3.15124e-07	56992, 221150, 890, 64151, 699, 113130, 3833, 1063, 54443, 9735, 3070, 9212, 1663, 11339, 9133, 11004, 83461, 5347, 701, 891, 259266
	GO:0048285~organelle fission	21	7.29167	8.30053e-10	3.49037e-07	56992, 221150, 890, 64151, 699, 113130, 3833, 1063, 54443, 9735, 3070, 9212, 1663, 11339, 9133, 11004, 83461, 5347, 701, 891, 259266
	GO:0000278~mitotic cell cycle	26	9.02778	1.35694e-09	4.56476e-07	1869, 64151, 113130, 1028, 3070, 1663, 5347, 83461, 701, 7272, 259266, 56992, 221150, 890, 699, 3833, 1063, 54443, 9735, 9212, 11339, 9133, 11004, 1058, 891, 9055
	GO:0000279~M phase	24	8.33333	3.37487e-09	9.46087e-07	56992, 221150, 3306, 890, 64151, 699, 113130, 3833, 1063, 54443, 9735, 3070, 9212, 1663, 11339, 9133, 11004, 83461, 5347, 701, 891, 7272, 9055, 259266
	GO:0022403~cell cycle phase	26	9.02778	1.32094e-08	3.17403e-06	1869, 64151, 113130, 1028, 3070, 1663, 83461, 5347, 701, 7272, 259266, 56992, 221150, 3306, 890, 699, 3833, 1063, 54443, 9735, 9212, 11339, 9133, 11004, 891, 9055
	GO:0007049~cell cycle	36	12.5	2.77433e-08	5.833e-06	1869, 64151, 29127, 113130, 1028, 3070, 1663, 144455, 5347, 83461, 157570, 55355, 701, 50486, 7272, 259266, 2619, 221150, 56992, 81620, 3306, 890, 699, 3833, 1063, 4171, 54443, 9735, 9212, 11004, 11339, 9133, 1058, 891, 9055, 1163
	GO:0022402~cell cycle process	29	10.0694	1.17302e-07	2.19223e-05	1869, 64151, 29127, 113130, 1028, 3070, 1663, 5347, 83461, 701, 7272, 259266, 2619, 56992, 221150, 3306, 890, 699, 3833, 1063, 54443, 9735, 9212, 11339, 9133, 11004, 1058, 891, 9055
	GO:0048878~chemical homeostasis	22	7.63889	8.27433e-05	0.0138216	2053, 286133, 5950, 54413, 10242, 4023, 654466, 4306, 10891, 2167, 5733, 2252, 5010, 9104, 9170, 5348, 185, 4908, 3932, 730, 57419, 4881
	GO:0007059~chromosome segregation	8	2.77778	0.000324413	0.0484031	1663, 221150, 64151, 113130, 3833, 55355, 1063, 64946
BT	GO:0007275~multicellular organismal development	152	23.676	6.41327e-09	1.52891e-05	3725, 4208, 154796, 50937, 1410, 2006, 22871, 3149, 1191, 7498, 8928, 1009, 54510, 5376, 64399, 283, 8321, 6414, 4613, 8324, 25791, 4211, 2200, 677, 9638, 23705, 1281, 3206, 5176, 3090, 3488, 56999, 4884, 6692, 1594, 8728, 11005, 3491, 23452, 7074, 29842, 7077, 1490, 4223, 5451, 8536, 7078, 6604, 253738, 1910, 342035, 2627, 8654, 2078, 5350, 54475, 7041, 10732, 5803, 10085, 6886, 4803, 51804, 704…
	GO:0032502~developmental process	162	25.2336	1.35125e-08	1.61067e-05	10894, 3725, 4208, 154796, 50937, 1410, 2006, 22871, 3149, 1191, 7498, 8928, 1009, 79689, 54510, 5376, 64399, 283, 8321, 6414, 4613, 8324, 25791, 4211, 2200, 677, 9638, 23705, 1281, 3206, 5176, 3090, 3488, 3092, 56999, 4884, 6692, 1594, 8728, 11005, 3491, 23452, 7074, 29842, 7077, 1490, 4223, 5451, 8536, 7078, 6604, 253738, 1910, 342035, 2627, 8654, 2078, 5350, 3316, 54475, 7041, 10732, 5803, 100…
	GO:0048731~system development	127	19.7819	4.73672e-08	3.76404e-05	154796, 4208, 3725, 1410, 2006, 22871, 7498, 1191, 8928, 1009, 54510, 5376, 64399, 283, 8321, 6414, 4613, 25791, 2200, 677, 9638, 23705, 1281, 3206, 5176, 3488, 4884, 6692, 1594, 8728, 11005, 3491, 7074, 29842, 7077, 1490, 4223, 5451, 8536, 7078, 6604, 1910, 342035, 2627, 8654, 5350, 7041, 5803, 6886, 4803, 51804, 7049, 8444, 388228, 9378, 9890, 1306, 1308, 4436, 2593, 9759, 9562, 1303, 27295, 63…
	GO:0048856~anatomical structure development	135	21.028	4.77996e-08	2.84881e-05	10894, 3725, 4208, 154796, 50937, 1410, 2006, 22871, 1191, 7498, 8928, 1009, 54510, 5376, 64399, 283, 8321, 6414, 4613, 25791, 2200, 677, 9638, 23705, 1281, 3206, 5176, 3488, 4884, 6692, 1594, 8728, 11005, 3491, 7074, 29842, 7077, 1490, 4223, 5451, 8536, 7078, 6604, 1910, 342035, 2627, 8654, 5350, 3316, 54475, 7041, 5803, 6886, 4803, 51804, 7049, 8444, 388228, 9378, 9890, 1306, 1308, 4436, 2593, …
	GO:0007155~cell adhesion	50	7.78816	1.63107e-06	0.000777394	10894, 50937, 1001, 22871, 55742, 1009, 54510, 3728, 947, 4256, 4254, 1524, 8839, 4921, 9638, 23705, 2157, 1281, 8406, 4267, 3491, 4026, 1490, 25945, 4685, 4684, 7041, 10085, 1842, 169044, 1307, 8506, 9378, 91653, 1306, 1308, 4867, 395, 8082, 3371, 57717, 1303, 54749, 6387, 4958, 183, 81578, 22915, 5239, 79633
	GO:0022610~biological adhesion	50	7.78816	1.69253e-06	0.000672273	10894, 50937, 1001, 22871, 55742, 1009, 54510, 3728, 947, 4256, 4254, 1524, 8839, 4921, 9638, 23705, 2157, 1281, 8406, 4267, 3491, 4026, 1490, 25945, 4685, 4684, 7041, 10085, 1842, 169044, 1307, 8506, 9378, 91653, 1306, 1308, 4867, 395, 8082, 3371, 57717, 1303, 54749, 6387, 4958, 183, 81578, 22915, 5239, 79633
	GO:0007010~cytoskeleton organization	35	5.45171	7.48429e-06	0.0025457	154796, 6444, 1410, 6445, 2006, 51673, 11076, 55742, 9828, 283, 9700, 10391, 57381, 9493, 23136, 7273, 30846, 1266, 23022, 1264, 4867, 5881, 395, 23500, 11116, 857, 9118, 27295, 6840, 1674, 4629, 11337, 5592, 83992, 10435
	GO:0048513~organ development	93	14.486	1.2436e-05	0.0036991	154796, 4208, 3725, 1410, 2006, 4855, 7704, 7498, 2702, 1191, 6659, 8928, 54510, 3625, 845, 283, 64399, 641, 9201, 4256, 8321, 6414, 4613, 3198, 4254, 2247, 130497, 6663, 2200, 677, 1281, 23705, 3488, 51053, 9118, 6692, 1594, 6840, 11005, 8728, 3491, 25884, 29842, 1490, 4223, 5451, 7078, 5592, 2118, 6935, 6604, 6444, 1910, 6445, 25945, 760, 2627, 8613, 3600, 5350, 7041, 6886, 51804, 10468, 7049, …
	GO:0003012~muscle system process	19	2.9595	1.91816e-05	0.00506815	1910, 1410, 59, 10324, 2702, 8082, 9759, 2593, 7138, 6332, 845, 1674, 3757, 183, 6865, 4629, 7273, 1266, 1837
	GO:0006936~muscle contraction	18	2.80374	2.02636e-05	0.00481925	1910, 1410, 59, 10324, 2702, 8082, 2593, 7138, 6332, 845, 1674, 3757, 183, 6865, 4629, 7273, 1266, 1837
	GO:0030154~cell differentiation	87	13.5514	3.35371e-05	0.00724218	154796, 4208, 3725, 50937, 7022, 5919, 4855, 22871, 7704, 1191, 6659, 25925, 79689, 3625, 283, 64399, 5376, 641, 9201, 4256, 8321, 3198, 4254, 2247, 25791, 84824, 6663, 677, 9638, 23705, 5881, 5176, 3488, 3092, 9118, 11005, 25884, 29842, 7074, 1490, 7077, 8536, 5451, 5592, 2118, 6604, 1910, 4685, 342035, 2627, 3600, 51062, 5521, 54475, 7041, 10732, 5803, 6886, 4803, 7049, 7273, 8444, 9378, 7855, …
	GO:0032501~multicellular organismal process	189	29.4393	3.36706e-05	0.00666702	3725, 4208, 154796, 50937, 1410, 113451, 1001, 2006, 22871, 3149, 1191, 7498, 8928, 1009, 54510, 5376, 64399, 283, 5023, 8321, 6414, 4613, 8324, 6865, 25791, 2206, 4211, 2200, 677, 9638, 23705, 2157, 5179, 1281, 3206, 5176, 3090, 24, 3488, 56999, 4884, 477, 1594, 6692, 8728, 11005, 3491, 23452, 56648, 7074, 29842, 7077, 1490, 2162, 4223, 5451, 8536, 7078, 11337, 253738, 6604, 1910, 10324, 342035,…
	GO:0048869~cellular developmental process	88	13.7072	8.81839e-05	0.0160422	154796, 4208, 3725, 50937, 7022, 5919, 4855, 22871, 7704, 1191, 6659, 25925, 79689, 3625, 283, 64399, 5376, 641, 9201, 4256, 8321, 3198, 4254, 2247, 25791, 84824, 6663, 677, 9638, 23705, 5881, 5176, 3488, 3092, 9118, 11005, 25884, 29842, 7074, 1490, 7077, 8536, 5451, 5592, 2118, 6604, 1910, 4685, 342035, 2627, 3600, 51062, 5521, 54475, 7041, 10732, 5803, 6886, 4803, 7049, 7273, 8444, 9378, 7855, …
	GO:0009653~anatomical structure morphogenesis	66	10.2804	0.000138002	0.0232274	154796, 3725, 10894, 50937, 2006, 4855, 2702, 1191, 7704, 283, 64399, 5376, 9201, 4256, 4613, 3198, 2247, 6663, 4653, 677, 9638, 3206, 51053, 9118, 6692, 3491, 29842, 1490, 55790, 5451, 4223, 7078, 2118, 6935, 6604, 25945, 4685, 760, 8613, 51062, 54475, 7041, 5803, 51804, 7049, 10468, 7273, 9378, 7855, 9890, 1306, 2045, 83439, 2593, 857, 4487, 6387, 81575, 5396, 357, 183, 8914, 3977, 4629, 116039…
	GO:0045595~regulation of cell differentiation	34	5.29595	0.00019219	0.0300865	3725, 4855, 22871, 1191, 3149, 7704, 760, 7498, 23532, 2627, 3600, 7041, 8321, 10732, 4254, 6886, 4803, 2247, 10468, 7049, 54997, 91653, 5176, 9759, 857, 654, 1594, 81575, 11005, 183, 7074, 7077, 8536, 6935
	GO:0009888~tissue development	42	6.54206	0.000208045	0.0305263	3725, 1910, 2006, 4855, 760, 8928, 2627, 5350, 4256, 7041, 8321, 4254, 51804, 130497, 7049, 10468, 7273, 1281, 1308, 83439, 3371, 3488, 9562, 857, 4487, 654, 9118, 6840, 1594, 11005, 1832, 5396, 183, 25884, 8914, 29842, 1490, 4629, 4223, 7078, 4772, 6935
	GO:0030036~actin cytoskeleton organization	20	3.11526	0.000303522	0.0416775	154796, 2006, 1264, 4867, 5881, 23500, 395, 55742, 9828, 283, 27295, 10391, 57381, 23136, 4629, 7273, 30846, 5592, 1266, 10435
TK	GO:0002376~immune system process	53	12.2685	2.34922e-08	5.13997e-05	8530, 11151, 940, 7293, 8638, 57823, 119, 6352, 3676, 2207, 7852, 23303, 3593, 4689, 4318, 671, 654817, 970, 973, 939, 11006, 10437, 3689, 5450, 64135, 146722, 3561, 1230, 962, 197358, 924, 3512, 3458, 4277, 6372, 10261, 916, 27240, 2302, 1118, 1880, 5996, 8807, 4283, 719, 356, 7433, 714, 399, 1536, 563, 91543, 4068
	GO:0006955~immune response	42	9.72222	2.51199e-08	2.74808e-05	64135, 8530, 11151, 146722, 3561, 7293, 940, 1230, 8638, 924, 57823, 3512, 6352, 3458, 4277, 6372, 2207, 10261, 7852, 3593, 4689, 671, 654817, 970, 973, 27240, 1118, 2302, 939, 11006, 8807, 4283, 5996, 1880, 356, 7433, 714, 5450, 1536, 563, 4068, 91543
	GO:0006952~defense response	35	8.10185	2.20927e-06	0.00161	134, 64135, 11151, 7293, 4599, 1230, 962, 313, 3620, 57823, 6352, 3458, 6372, 7852, 2152, 658, 1441, 671, 55937, 654817, 5345, 3818, 54899, 8807, 4283, 719, 7305, 10578, 3689, 64386, 714, 1536, 4068, 91543, 4069
	GO:0006954~inflammatory response	21	4.86111	6.92102e-05	0.0371516	134, 658, 7293, 1230, 5345, 313, 3620, 3818, 54899, 4283, 6352, 8807, 719, 64386, 3689, 714, 6372, 7852, 2152, 1536, 4069
BK	GO:0022403~cell cycle phase	46	6.62824	2.4032e-10	6.54872e-07	8438, 10460, 9319, 11130, 79023, 9985, 347733, 51203, 8317, 332, 10403, 22974, 10609, 79866, 6790, 983, 1033, 55165, 7164, 2175, 595, 55143, 55872, 5424, 54892, 81930, 1111, 3832, 2672, 26271, 1062, 25788, 6502, 5902, 9232, 83540, 990, 4751, 55055, 11144, 898, 4085, 1164, 10051, 56603, 9156
	GO:0007049~cell cycle	67	9.65418	6.71955e-10	9.15539e-07	332, 8317, 63922, 11190, 10403, 8318, 22974, 23176, 10609, 983, 7164, 3714, 54892, 5603, 2672, 25788, 6502, 4751, 84687, 55055, 5596, 11144, 4085, 9156, 56603, 10051, 8438, 55215, 10460, 9319, 11130, 79023, 9985, 347733, 51203, 55722, 79866, 6790, 1033, 55165, 286826, 2175, 595, 4172, 55143, 79733, 10036, 55872, 5424, 4176, 4869, 81930, 1111, 3832, 26271, 1062, 26586, 7157, 5902, 9232, 9134, 5524…
	GO:0000279~M phase	38	5.4755	4.00283e-09	3.6359e-06	10460, 8438, 9319, 11130, 79023, 9985, 347733, 51203, 332, 10403, 22974, 10609, 79866, 6790, 983, 55165, 2175, 55143, 55872, 54892, 81930, 1111, 3832, 26271, 1062, 25788, 5902, 9232, 83540, 990, 4751, 55055, 11144, 4085, 1164, 10051, 56603, 9156
	GO:0022402~cell cycle process	51	7.3487	2.67119e-08	1.81973e-05	8317, 332, 11190, 10403, 10609, 22974, 983, 7164, 54892, 2672, 25788, 6502, 4751, 84687, 55055, 11144, 4085, 10051, 56603, 9156, 8438, 10460, 9319, 11130, 9985, 79023, 347733, 51203, 79866, 55722, 6790, 1033, 55165, 2175, 595, 55143, 55872, 5424, 4869, 81930, 1111, 3832, 1062, 26271, 5902, 7157, 9232, 83540, 990, 898, 1164
	GO:0006259~DNA metabolic process	45	6.48415	3.11164e-07	0.00016957	7517, 55215, 8438, 9319, 9985, 1763, 8317, 63922, 7298, 348654, 51659, 8318, 1789, 64919, 5985, 286826, 2175, 7083, 4172, 10036, 23649, 5424, 4176, 55775, 10535, 1111, 1773, 7153, 56953, 25788, 6996, 27301, 7157, 836, 9232, 1776, 9134, 10721, 3978, 990, 11144, 64858, 64421, 2967, 9156
	GO:0000278~mitotic cell cycle	35	5.04323	2.11558e-06	0.000960367	11130, 79023, 347733, 51203, 8317, 332, 11190, 10403, 22974, 79866, 983, 6790, 1033, 55165, 7164, 595, 55143, 55872, 5424, 54892, 81930, 1111, 3832, 2672, 1062, 26271, 6502, 9232, 83540, 990, 4751, 55055, 898, 4085, 10051
	GO:0007067~mitosis	25	3.60231	3.8267e-06	0.00148857	11130, 79023, 347733, 51203, 332, 10403, 22974, 79866, 983, 6790, 55165, 55143, 55872, 54892, 81930, 3832, 1062, 26271, 9232, 83540, 990, 4751, 55055, 4085, 10051
	GO:0000280~nuclear division	25	3.60231	3.8267e-06	0.00148857	11130, 79023, 347733, 51203, 332, 10403, 22974, 79866, 983, 6790, 55165, 55143, 55872, 54892, 81930, 3832, 1062, 26271, 9232, 83540, 990, 4751, 55055, 4085, 10051
	GO:0000087~M phase of mitotic cell cycle	25	3.60231	5.23723e-06	0.00178234	11130, 79023, 347733, 51203, 332, 10403, 22974, 79866, 983, 6790, 55165, 55143, 55872, 54892, 81930, 3832, 1062, 26271, 9232, 83540, 990, 4751, 55055, 4085, 10051
	GO:0048285~organelle fission	25	3.60231	7.65924e-06	0.00231637	11130, 79023, 347733, 51203, 332, 10403, 22974, 79866, 983, 6790, 55165, 55143, 55872, 54892, 81930, 3832, 1062, 26271, 9232, 83540, 990, 4751, 55055, 4085, 10051
	GO:0007059~chromosome segregation	14	2.01729	1.12334e-05	0.00305643	11130, 9985, 79023, 51203, 81930, 332, 10403, 7153, 1062, 9232, 83540, 4751, 4085, 10051
	GO:0006260~DNA replication	22	3.17003	1.25355e-05	0.00310058	4172, 10036, 23649, 5424, 4176, 1763, 10535, 7298, 1111, 8317, 63922, 7153, 51659, 8318, 56953, 9134, 10721, 3978, 990, 5985, 286826, 7083
	GO:0006950~response to stress	96	13.8329	5.57088e-05	0.0125712	2810, 1763, 7298, 6513, 983, 7351, 55504, 5985, 2205, 6665, 57761, 6769, 8542, 3714, 5790, 56997, 5603, 6507, 4192, 1036, 80274, 25788, 1380, 836, 60489, 6364, 6363, 1236, 10721, 9214, 51129, 9111, 4600, 2161, 201294, 91319, 9156, 3959, 7517, 55215, 10460, 8438, 9319, 3741, 64170, 6289, 81035, 6288, 3606, 6892, 348654, 217, 2766, 6280, 6188, 79626, 10563, 727, 7422, 1803, 2878, 11077, 3556, 2175,…
	GO:0002376~immune system process	63	9.07781	9.86416e-05	0.0204655	5167, 684, 84433, 219790, 80381, 6495, 3635, 8542, 3714, 3205, 3136, 146894, 1380, 60489, 836, 4938, 6364, 6363, 9214, 1236, 2161, 201294, 9156, 10460, 861, 8862, 63940, 64170, 6289, 6288, 5087, 81035, 65082, 3606, 6892, 51192, 6280, 921, 80328, 79626, 10563, 727, 7422, 1803, 64919, 3556, 53833, 3557, 10462, 8482, 4940, 171392, 100133941, 915, 57817, 7157, 4282, 22914, 54209, 3978, 7097, 64421, 2…
	GO:0006974~response to DNA damage stimulus	31	4.46686	0.000104439	0.0201242	55215, 7517, 8438, 9319, 2810, 1763, 7298, 348654, 6188, 983, 5985, 2175, 595, 10036, 5424, 4176, 55775, 1111, 7153, 25788, 6996, 836, 7157, 27301, 9232, 10721, 3978, 64858, 64421, 2967, 9156
	GO:0051301~cell division	26	3.7464	0.000173417	0.0310156	11130, 79023, 51203, 332, 8317, 10403, 79866, 983, 55165, 595, 55143, 54892, 3832, 1062, 26271, 9232, 9134, 83540, 3978, 990, 4751, 55055, 4085, 898, 1164, 10051
	GO:0051726~regulation of cell cycle	28	4.03458	0.000181436	0.030431	10460, 11130, 2810, 51203, 332, 8317, 8318, 983, 1033, 10733, 595, 8851, 7039, 4869, 1111, 26271, 1062, 6502, 836, 7157, 5902, 9134, 990, 4751, 84687, 55055, 4085, 1164
	GO:0006281~DNA repair	25	3.60231	0.000242497	0.0381297	8438, 55215, 7517, 9319, 1763, 7298, 348654, 5985, 2175, 10036, 5424, 55775, 1111, 7153, 25788, 6996, 7157, 27301, 9232, 10721, 3978, 64858, 64421, 9156, 2967
	GO:0051239~regulation of multicellular organismal process	58	8.35735	0.000326535	0.0482396	5167, 2254, 84433, 285, 1573, 80381, 3486, 2205, 6665, 6495, 3635, 6662, 53637, 375790, 57731, 3207, 9353, 6507, 344, 51665, 5071, 4886, 6405, 10626, 4830, 51129, 2161, 861, 64170, 6286, 6289, 6288, 5087, 6804, 3606, 3908, 1789, 7139, 7422, 29108, 624, 53833, 595, 8851, 171392, 7010, 100133941, 152330, 7157, 5090, 22914, 10553, 10644, 3768, 7097, 140, 4915, 4916
	GO:0051327~M phase of meiotic cell cycle	13	1.8732	0.000352509	0.049309	8438, 9319, 9985, 1111, 26271, 10609, 25788, 4751, 2175, 11144, 1164, 9156, 56603
	GO:0007126~meiosis	13	1.8732	0.000352509	0.049309	8438, 9319, 9985, 1111, 26271, 10609, 25788, 4751, 2175, 11144, 1164, 9156, 56603
	GO:0000070~mitotic sister chromatid segregation	8	1.15274	0.000366235	0.0486837	11130, 4751, 51203, 81930, 10403, 1062, 4085, 10051
TGCT	GO:0019953~sexual reproduction	90	4.95595	1.01419e-15	3.47622e-12	6462, 148229, 284359, 3640, 374768, 10343, 373863, 1047, 373861, 10406, 23553, 219793, 10693, 4000, 2649, 56776, 55815, 124626, 58531, 1770, 23617, 604, 881, 84073, 158800, 219938, 81629, 132851, 2067, 117155, 582, 342977, 3815, 4117, 80237, 51361, 56165, 56163, 167, 84953, 402381, 441161, 204474, 353189, 202051, 54361, 583, 10149, 11086, 29947, 81616, 113746, 2515, 4086, 83890, 4184, 140732, 838…
	GO:0022414~reproductive process	122	6.71806	4.90799e-14	8.53605e-11	1004, 10343, 373863, 5021, 373861, 10406, 6422, 10693, 2649, 124626, 6869, 58531, 604, 84073, 881, 158800, 81629, 219938, 132851, 117155, 3293, 4117, 80237, 51361, 167, 3490, 55366, 202051, 10149, 11086, 81616, 4838, 83890, 4184, 83893, 317719, 9576, 7042, 91978, 284083, 51298, 374407, 341567, 595, 8852, 378807, 5568, 8748, 6674, 93661, 89869, 58524, 22917, 4956, 116369, 26330, 8433, 7056, 6462, …
	GO:0048232~male gamete generation	67	3.68943	5.19625e-14	6.02545e-11	6462, 3640, 374768, 373861, 10406, 219793, 10693, 2649, 4000, 55815, 58531, 1770, 23617, 604, 84073, 881, 219938, 81629, 2067, 132851, 117155, 342977, 3815, 4117, 80237, 51361, 56165, 56163, 84953, 402381, 204474, 353189, 202051, 583, 10149, 11086, 29947, 81616, 113746, 83890, 140732, 83893, 7141, 7142, 317719, 9576, 8900, 83983, 11077, 2879, 117144, 91978, 284083, 255220, 51298, 374407, 341567, …
	GO:0007283~spermatogenesis	67	3.68943	5.19625e-14	6.02545e-11	6462, 3640, 374768, 373861, 10406, 219793, 10693, 2649, 4000, 55815, 58531, 1770, 23617, 604, 84073, 881, 219938, 81629, 2067, 132851, 117155, 342977, 3815, 4117, 80237, 51361, 56165, 56163, 84953, 402381, 204474, 353189, 202051, 583, 10149, 11086, 29947, 81616, 113746, 83890, 140732, 83893, 7141, 7142, 317719, 9576, 8900, 83983, 11077, 2879, 117144, 91978, 284083, 255220, 51298, 374407, 341567, …
	GO:0000003~reproduction	122	6.71806	7.77775e-14	6.76897e-11	1004, 10343, 373863, 5021, 373861, 10406, 6422, 10693, 2649, 124626, 6869, 58531, 604, 84073, 881, 158800, 81629, 219938, 132851, 117155, 3293, 4117, 80237, 51361, 167, 3490, 55366, 202051, 10149, 11086, 81616, 4838, 83890, 4184, 83893, 317719, 9576, 7042, 91978, 284083, 51298, 374407, 341567, 595, 8852, 378807, 5568, 8748, 6674, 93661, 89869, 58524, 22917, 4956, 116369, 26330, 8433, 7056, 6462, …
	GO:0048609~reproductive process in a multicellular organism	83	4.57048	3.96058e-11	2.75577e-08	6462, 3640, 374768, 5021, 373863, 373861, 10406, 219793, 10693, 2649, 4000, 56776, 3623, 55815, 6869, 58531, 1770, 23617, 604, 881, 84073, 158800, 219938, 81629, 132851, 2067, 117155, 342977, 3791, 3815, 4117, 80237, 51361, 56165, 56163, 84953, 402381, 204474, 353189, 202051, 54361, 583, 10149, 11086, 29947, 81616, 113746, 4838, 4086, 83890, 4184, 140732, 83893, 7141, 7142, 317719, 9576, 7042, 89…
	GO:0032504~multicellular organism reproduction	83	4.57048	3.96058e-11	2.75577e-08	6462, 3640, 374768, 5021, 373863, 373861, 10406, 219793, 10693, 2649, 4000, 56776, 3623, 55815, 6869, 58531, 1770, 23617, 604, 881, 84073, 158800, 219938, 81629, 132851, 2067, 117155, 342977, 3791, 3815, 4117, 80237, 51361, 56165, 56163, 84953, 402381, 204474, 353189, 202051, 54361, 583, 10149, 11086, 29947, 81616, 113746, 4838, 4086, 83890, 4184, 140732, 83893, 7141, 7142, 317719, 9576, 7042, 89…
	GO:0007276~gamete generation	72	3.96476	4.14881e-11	2.40562e-08	6462, 3640, 374768, 373863, 373861, 10406, 219793, 10693, 2649, 4000, 56776, 55815, 58531, 1770, 23617, 604, 881, 84073, 158800, 219938, 81629, 132851, 2067, 117155, 342977, 3815, 4117, 80237, 51361, 56165, 56163, 84953, 402381, 204474, 353189, 202051, 54361, 583, 10149, 11086, 29947, 81616, 113746, 4086, 83890, 140732, 83893, 7141, 7142, 317719, 9576, 8900, 83983, 11077, 2879, 117144, 91978, 284…
	GO:0032502~developmental process	335	18.4471	6.16696e-10	3.06498e-07	6770, 10205, 1413, 3280, 4897, 10203, 56243, 1311, 3866, 335, 745, 51176, 79600, 2012, 2956, 608, 6616, 604, 84073, 6495, 6615, 10718, 56913, 4488, 6781, 117155, 3293, 3853, 4117, 3852, 57216, 3487, 5362, 51361, 26005, 8115, 348, 6609, 3490, 28514, 91768, 55363, 202051, 55366, 3860, 7076, 4504, 58495, 1178, 6468, 4778, 347733, 84498, 312, 7042, 729, 27287, 441376, 284083, 80712, 11341, 10736, 512…
	GO:0007275~multicellular organismal development	303	16.685	1.3158e-08	5.72205e-06	6770, 1413, 3280, 10203, 4897, 1311, 56243, 3866, 335, 745, 51176, 79600, 2012, 2956, 608, 6616, 604, 6495, 6615, 84073, 10718, 56913, 4488, 6781, 117155, 3293, 3853, 4117, 3852, 57216, 3487, 5362, 51361, 26005, 8115, 348, 6609, 3490, 28514, 91768, 55363, 202051, 55366, 3860, 7076, 4504, 58495, 1178, 6468, 4778, 347733, 7042, 729, 27287, 441376, 284083, 80712, 11341, 10736, 51298, 55107, 220, 224…
	GO:0007338~single fertilization	20	1.10132	9.36553e-08	3.62023e-05	148229, 49, 4184, 284359, 8852, 10343, 7141, 7142, 1047, 23553, 167, 8748, 124626, 6674, 10566, 89869, 22917, 117144, 85413, 2515
	GO:0009566~fertilization	23	1.26652	1.2248e-07	4.26098e-05	148229, 49, 4184, 284359, 8852, 10343, 582, 7141, 7142, 1047, 317719, 23553, 167, 8748, 6674, 124626, 10566, 441161, 89869, 22917, 117144, 85413, 2515
	GO:0048869~cellular developmental process	190	10.4626	5.98591e-07	0.0001893	6770, 4303, 284217, 3280, 373863, 373861, 55183, 4897, 6422, 745, 58531, 51176, 3880, 2012, 9149, 6616, 604, 881, 84073, 6495, 7545, 56913, 81629, 219938, 1280, 117155, 3853, 51361, 4117, 57216, 3852, 26005, 25975, 8115, 348, 28514, 55363, 202051, 51626, 54820, 1277, 7076, 81616, 4504, 4838, 58495, 83890, 6284, 26140, 83893, 3217, 54538, 347733, 353500, 84498, 317719, 9576, 312, 7042, 56033, 4804…
	GO:0030154~cell differentiation	181	9.96696	1.84543e-06	0.000534877	6770, 4303, 284217, 3280, 373863, 373861, 55183, 4897, 6422, 745, 58531, 51176, 3880, 2012, 9149, 6616, 604, 881, 84073, 6495, 7545, 56913, 81629, 219938, 1280, 117155, 3853, 51361, 3852, 4117, 25975, 8115, 348, 28514, 55363, 202051, 54820, 1277, 7076, 81616, 4504, 4838, 58495, 83890, 6284, 83893, 3217, 54538, 347733, 353500, 84498, 317719, 9576, 312, 7042, 56033, 4804, 3796, 91978, 284083, 6585,…
	GO:0003006~reproductive developmental process	44	2.42291	3.70776e-06	0.000991764	6462, 1004, 3640, 1761, 7141, 373863, 317719, 9576, 373861, 6422, 3623, 6928, 7042, 83983, 91978, 284083, 6665, 255220, 247, 132625, 6662, 341567, 6716, 595, 2067, 8999, 3791, 3815, 3293, 5568, 51361, 56165, 9271, 56163, 57082, 93661, 402381, 3976, 55366, 58524, 54361, 583, 26330, 8433
	GO:0048610~reproductive cellular process	31	1.70705	9.90336e-06	0.00245797	6462, 148229, 4184, 10343, 7141, 7142, 373863, 317719, 373861, 9576, 124626, 83983, 10566, 91978, 284083, 255220, 49, 595, 341567, 2067, 3815, 51361, 56165, 9271, 56163, 57082, 93661, 89869, 54361, 583, 26330
	GO:0007286~spermatid development	16	0.881057	1.27918e-05	0.00296248	341567, 7141, 3815, 317719, 9576, 51361, 9271, 56163, 57082, 93661, 83983, 583, 91978, 284083, 255220, 26330
	GO:0048515~spermatid differentiation	16	0.881057	2.6008e-05	0.00563923	341567, 7141, 3815, 317719, 9576, 51361, 9271, 56163, 57082, 93661, 83983, 583, 91978, 284083, 255220, 26330
	GO:0030317~sperm motility	10	0.550661	7.67477e-05	0.0155841	27285, 4184, 8852, 7141, 7142, 117144, 378807, 858, 85413, 26330
	GO:0007281~germ cell development	21	1.15639	0.000111623	0.0213443	341567, 2067, 7141, 373863, 3815, 317719, 373861, 9576, 51361, 56165, 9271, 56163, 57082, 93661, 83983, 54361, 583, 91978, 284083, 255220, 26330
	GO:0048870~cell motility	44	2.42291	0.000179375	0.0323138	4184, 4041, 1767, 284217, 56171, 5578, 7141, 7142, 1496, 5080, 4897, 55567, 335, 3383, 7042, 27285, 6376, 117144, 3553, 6495, 6900, 5796, 5077, 3570, 8852, 100133941, 378807, 3791, 146754, 3815, 858, 5362, 10512, 1012, 460, 5979, 54820, 1839, 85413, 58191, 51473, 26330, 4838, 58495
	GO:0051674~localization of cell	44	2.42291	0.000179375	0.0323138	4184, 4041, 1767, 284217, 56171, 5578, 7141, 7142, 1496, 5080, 4897, 55567, 335, 3383, 7042, 27285, 6376, 117144, 3553, 6495, 6900, 5796, 5077, 3570, 8852, 100133941, 378807, 3791, 146754, 3815, 858, 5362, 10512, 1012, 460, 5979, 54820, 1839, 85413, 58191, 51473, 26330, 4838, 58495
TCC	GO:0048731~system development	443	16.4562	5.84971e-12	2.51598e-08	8220, 3280, 6874, 6347, 3479, 7348, 1310, 2950, 8879, 22801, 1827, 6493, 79810, 6095, 140467, 3299, 165, 5364, 50617, 1717, 1718, 6876, 129831, 8313, 6777, 58495, 1435, 7227, 170575, 5354, 51195, 3399, 627, 1440, 347273, 94081, 320, 1305, 322, 6389, 6899, 6382, 2001, 8434, 387357, 27022, 6597, 7249, 26298, 430, 2101, 2995, 578, 3239, 94234, 50848, 5328, 641700, 50861, 50863, 2121, 3397, 8626, 339…
	GO:0048856~anatomical structure development	473	17.5706	1.03485e-11	2.22544e-08	8220, 3280, 6874, 6347, 3479, 7348, 1310, 2950, 8879, 22801, 1827, 6493, 79810, 6095, 8870, 140467, 7482, 3299, 165, 5364, 50617, 1717, 1718, 6876, 129831, 8313, 6777, 58495, 1435, 7227, 170575, 5354, 51195, 3399, 627, 1440, 347273, 917, 94081, 320, 1305, 322, 6389, 6899, 6382, 2001, 8434, 387357, 27022, 6597, 7249, 26298, 430, 2101, 2995, 578, 3239, 94234, 50848, 5328, 641700, 50861, 50863, 2121…
	GO:0048513~organ development	332	12.3328	3.62943e-09	5.20338e-06	4209, 1474, 3087, 3280, 3082, 6874, 3479, 6347, 3861, 7348, 1310, 10202, 7168, 4212, 7163, 7067, 8879, 22801, 6615, 1827, 6493, 4488, 6095, 79810, 3713, 1489, 3853, 3852, 3299, 3854, 165, 1717, 1718, 3918, 7071, 6876, 3915, 6777, 3910, 58495, 5754, 1435, 4776, 3846, 51599, 170575, 1072, 3399, 627, 1440, 441376, 4781, 4094, 1999, 7046, 4092, 4232, 7043, 347273, 9993, 1464, 94081, 1305, 4621, 7050,…
	GO:0032502~developmental process	551	20.4681	1.01943e-08	1.09614e-05	8220, 3280, 6874, 6347, 3479, 7348, 1310, 154, 51174, 8322, 2950, 79083, 8325, 8878, 537, 8879, 22801, 1827, 6493, 6095, 79810, 8870, 140467, 51361, 7482, 3299, 165, 5364, 50617, 1717, 6361, 1718, 6876, 129831, 8313, 6777, 58495, 1435, 7227, 170575, 5354, 80864, 51195, 3399, 627, 1440, 518, 1848, 347273, 7216, 917, 94081, 320, 1305, 339324, 322, 85458, 6389, 6899, 6382, 2001, 8434, 387357, 27022,…
	GO:0022610~biological adhesion	155	5.7578	1.3433e-08	1.1555e-05	1292, 1291, 8416, 57575, 1296, 1297, 1294, 3280, 3339, 2335, 6347, 3683, 9746, 1310, 948, 57863, 7060, 1525, 3675, 60437, 154043, 6356, 3679, 3678, 1289, 7067, 4920, 6614, 255631, 1824, 22801, 64881, 64098, 9358, 29780, 5175, 1901, 3690, 25, 165, 27, 27076, 28513, 3918, 7412, 6404, 8727, 3687, 3913, 6696, 3915, 79987, 3910, 54822, 1000, 58494, 5754, 51208, 57152, 57555, 10174, 22795, 7414, 6401, …
	GO:0007275~multicellular organismal development	506	18.7964	1.5663e-08	1.12277e-05	8220, 3280, 6874, 6347, 3479, 7348, 1310, 51174, 8322, 2950, 8325, 8879, 22801, 1827, 6493, 6095, 79810, 140467, 51361, 7482, 3299, 165, 5364, 50617, 1717, 6361, 1718, 6876, 129831, 8313, 6777, 58495, 1435, 7227, 170575, 5354, 80864, 51195, 3399, 627, 1440, 347273, 7216, 94081, 320, 1305, 339324, 322, 85458, 6389, 6899, 6382, 2001, 8434, 387357, 27022, 6597, 7249, 84033, 26298, 9200, 430, 2101, 2…
	GO:0007155~cell adhesion	154	5.72065	2.17994e-08	1.33941e-05	1292, 1291, 8416, 57575, 1296, 1297, 1294, 3280, 3339, 2335, 6347, 3683, 9746, 1310, 948, 57863, 7060, 1525, 3675, 60437, 154043, 6356, 3679, 3678, 1289, 7067, 4920, 6614, 255631, 1824, 22801, 64881, 64098, 9358, 29780, 5175, 1901, 3690, 25, 165, 27, 27076, 28513, 3918, 7412, 6404, 8727, 3687, 3913, 6696, 3915, 79987, 3910, 54822, 1000, 58494, 5754, 51208, 57152, 57555, 10174, 22795, 7414, 6401, …
	GO:0009653~anatomical structure morphogenesis	238	8.84101	3.26152e-08	1.75346e-05	1474, 4209, 3087, 3280, 3082, 2335, 3479, 6347, 10486, 7168, 7163, 7067, 8879, 6615, 4488, 79810, 6095, 8870, 140467, 7482, 123872, 3913, 3915, 8313, 4222, 58495, 5754, 1435, 1072, 23396, 627, 7046, 1999, 4092, 7043, 117177, 9993, 1464, 917, 1305, 322, 2302, 7050, 7052, 6899, 6382, 7054, 7057, 7849, 27022, 4853, 6597, 7249, 65010, 2676, 2995, 3239, 578, 94234, 64843, 4154, 5328, 641700, 4843, 339…
	GO:0009888~tissue development	144	5.34918	1.80688e-07	8.63452e-05	1474, 4209, 7291, 1297, 1294, 3082, 3339, 3479, 7296, 3861, 6699, 7348, 1310, 1525, 7402, 5017, 7168, 2294, 1289, 7067, 4920, 6615, 1827, 5159, 79810, 3713, 1382, 1901, 3853, 7408, 3852, 3854, 1906, 5552, 1909, 3918, 1718, 7071, 6696, 3915, 6698, 1278, 4322, 58495, 5754, 3214, 3215, 3213, 3846, 1072, 8646, 283871, 3399, 3221, 1999, 4092, 4232, 3227, 3229, 84518, 596, 9421, 6278, 51119, 7050, 6899…
	GO:0001501~skeletal system development	80	2.97177	4.07193e-07	0.000175119	7291, 4209, 1297, 3339, 3479, 56243, 3727, 1310, 7020, 4920, 7067, 2101, 8879, 3239, 5159, 4488, 4313, 2121, 3209, 8626, 5549, 1240, 165, 50617, 1906, 2260, 1513, 7071, 1591, 2662, 6696, 8313, 4088, 1278, 4322, 5125, 10143, 3218, 3219, 3216, 5310, 3217, 3214, 7227, 3215, 1956, 3213, 5081, 7474, 6678, 9260, 8646, 283871, 10631, 84159, 2274, 3221, 5307, 7046, 4323, 7043, 3227, 596, 10682, 651, 2776…
	GO:0009605~response to external stimulus	178	6.61218	8.71694e-06	0.00340254	5168, 7292, 2335, 3479, 6347, 6423, 3683, 284, 1392, 9450, 948, 4615, 7168, 6357, 6356, 3678, 59341, 1289, 885, 6614, 1827, 11326, 5159, 51561, 3291, 6546, 6610, 79792, 51090, 9547, 3294, 3690, 7407, 1903, 3552, 1794, 6361, 2, 408, 1591, 8942, 64221, 3913, 6696, 1378, 6368, 6777, 51760, 4322, 8291, 51206, 4776, 2768, 6401, 313, 54472, 149233, 623, 6374, 6372, 54332, 1649, 3399, 9021, 1999, 4018, …
	GO:0040011~locomotion	95	3.52897	1.31245e-05	0.00469302	5168, 6722, 7291, 2919, 7249, 2335, 6347, 3383, 7060, 115908, 6357, 6356, 2676, 480, 3678, 1289, 885, 3579, 11251, 8879, 22801, 5328, 5159, 641700, 10163, 5646, 9547, 3397, 634, 284340, 1240, 5364, 1794, 51330, 7412, 6361, 10371, 6404, 7410, 64221, 8828, 6368, 3915, 23607, 6652, 4692, 1000, 58495, 51554, 3265, 2359, 2358, 64711, 9846, 6401, 3603, 1230, 11104, 6340, 1072, 4902, 6338, 6374, 84159, …
	GO:0009887~organ morphogenesis	117	4.34621	2.32542e-05	0.00766412	4209, 7291, 3087, 1296, 1297, 3339, 3479, 7296, 6347, 9927, 284, 7168, 2294, 1289, 4920, 7067, 8879, 6615, 5159, 4488, 79810, 4313, 3209, 7408, 1906, 3687, 1278, 58495, 5754, 3218, 3216, 1435, 3217, 3214, 3215, 3213, 56034, 8651, 1072, 8646, 27319, 283871, 3221, 10804, 9021, 10018, 7046, 4092, 7043, 6586, 9993, 3229, 596, 9421, 1305, 7050, 6899, 283987, 6382, 9620, 7054, 5818, 6722, 2054, 2050, 4…
	GO:0030154~cell differentiation	291	10.8098	2.50181e-05	0.00765657	4209, 3087, 3280, 3082, 2335, 3479, 3861, 7348, 1310, 3727, 154, 10202, 51174, 4616, 7168, 79083, 51776, 3925, 7163, 8878, 8879, 23139, 1827, 6493, 79810, 6095, 3713, 140467, 1489, 3853, 3852, 51361, 3299, 54993, 4118, 5364, 1717, 1591, 3913, 129831, 3915, 6777, 3910, 58495, 5754, 1435, 4776, 170575, 5354, 1072, 3399, 23396, 627, 1440, 1999, 7046, 4094, 1848, 347273, 1464, 94081, 1305, 322, 7050,…
	GO:0031589~cell-substrate adhesion	31	1.15156	2.6625e-05	0.00760532	8515, 5311, 5310, 8516, 10174, 22795, 10580, 2335, 3675, 3679, 6614, 22801, 10018, 3655, 87, 64098, 4059, 3673, 9358, 3672, 596, 3690, 3611, 1305, 27076, 51330, 8910, 3915, 7059, 54822, 88
	GO:0009792~embryonic development ending in birth or egg hatching	76	2.82318	3.42765e-05	0.00917178	6722, 7291, 27022, 6597, 3280, 7249, 3339, 6423, 9927, 56963, 56243, 2707, 7020, 6928, 7942, 7168, 430, 2294, 4920, 4154, 5159, 140467, 7976, 7408, 1906, 1909, 28982, 472, 8313, 585, 4222, 5125, 58495, 5754, 5311, 1601, 3218, 3219, 3216, 5310, 3217, 3214, 3215, 3213, 2768, 9096, 5081, 80864, 1072, 8646, 5801, 3516, 367, 1543, 10018, 7046, 7043, 94, 9421, 9837, 652, 129685, 2736, 5727, 51119, 320,…
	GO:0043009~chordate embryonic development	75	2.78603	4.49682e-05	0.0113127	6722, 7291, 27022, 6597, 3280, 7249, 3339, 6423, 9927, 56963, 56243, 2707, 7020, 6928, 7942, 7168, 430, 2294, 4920, 4154, 5159, 140467, 7976, 7408, 1906, 1909, 28982, 472, 8313, 585, 4222, 5125, 58495, 5754, 5311, 1601, 3218, 3219, 3216, 5310, 3217, 3214, 3215, 3213, 2768, 9096, 5081, 80864, 1072, 8646, 5801, 3516, 367, 10018, 7046, 7043, 94, 9421, 9837, 652, 129685, 2736, 5727, 51119, 320, 9839,…
	GO:0048869~cellular developmental process	299	11.107	5.92795e-05	0.0140651	4209, 3087, 3280, 3082, 2335, 3479, 3861, 7348, 1310, 3727, 154, 10202, 51174, 10486, 4616, 7168, 79083, 51776, 3925, 7163, 8878, 8879, 23139, 1827, 6493, 79810, 6095, 3713, 140467, 1489, 3853, 3852, 51361, 3299, 54993, 4118, 5364, 1717, 1591, 123872, 3913, 129831, 3915, 6777, 3910, 58495, 5754, 1435, 4776, 170575, 5354, 1072, 3399, 23396, 627, 1440, 4094, 1999, 7046, 1848, 117177, 347273, 1464, …
	GO:0033273~response to vitamin	23	0.854383	7.51716e-05	0.0168731	3673, 596, 2934, 7037, 652, 3294, 7782, 6347, 5468, 3992, 55172, 284, 5727, 360, 1591, 8942, 6696, 54332, 9314, 1543, 590, 4131, 4232
	GO:0007160~cell-matrix adhesion	28	1.04012	7.86174e-05	0.0167652	8515, 5311, 5310, 8516, 22795, 10580, 2335, 3675, 3679, 6614, 22801, 10018, 3655, 87, 64098, 4059, 3673, 9358, 3672, 596, 3690, 3611, 1305, 27076, 8910, 7059, 54822, 88
	GO:0042221~response to chemical stimulus	230	8.54383	0.000115635	0.0234063	64397, 6347, 59345, 3861, 1312, 10202, 4615, 1728, 7168, 6357, 6356, 8737, 7067, 2203, 1827, 4488, 3291, 5742, 23645, 3294, 1718, 6361, 2, 7071, 1591, 5652, 6368, 6777, 7079, 8412, 11080, 1075, 18, 6895, 1072, 21, 623, 6374, 6372, 3399, 627, 518, 7046, 4232, 7043, 152189, 9993, 8850, 5621, 719, 6382, 7054, 7057, 7220, 115, 111, 7249, 10580, 148327, 64581, 23175, 8835, 8836, 26034, 10060, 578, 532…
	GO:0048646~anatomical structure formation involved in morphogenesis	77	2.86033	0.000119384	0.0230706	6722, 7291, 688, 27022, 6597, 9510, 7249, 7296, 6423, 9927, 56963, 284, 7020, 6928, 7168, 80149, 3880, 4920, 5328, 641700, 4313, 6095, 10163, 3397, 7976, 634, 1901, 284340, 8626, 3611, 7408, 1906, 1909, 51330, 3953, 8828, 472, 8313, 23363, 4088, 70, 9314, 585, 4222, 58495, 64321, 5754, 1959, 9096, 1072, 8646, 3516, 10018, 93974, 2028, 4323, 7111, 57142, 94, 9421, 1464, 6278, 652, 2277, 290, 2736,…
	GO:0001952~regulation of cell-matrix adhesion	13	0.482912	0.000152787	0.0281691	1435, 596, 94, 7249, 1029, 3611, 948, 5590, 4088, 5295, 4323, 7057, 780
	GO:0030155~regulation of cell adhesion	37	1.37444	0.000160363	0.0283317	5140, 1435, 64093, 2934, 7249, 1029, 1952, 3383, 948, 8646, 7168, 283871, 2199, 3655, 4323, 4092, 780, 2064, 3673, 596, 2065, 94, 9370, 11117, 1901, 3611, 7052, 5590, 6696, 4088, 6777, 80725, 3910, 5274, 10451, 5295, 7057
	GO:0006928~cell motion	97	3.60327	0.000225275	0.0380191	5168, 7291, 800, 2335, 6347, 3479, 3683, 7060, 7168, 480, 3678, 885, 1289, 22801, 8879, 5159, 10163, 8875, 5646, 7408, 5364, 27076, 1794, 7412, 6404, 7410, 64221, 3915, 4692, 1000, 58495, 6401, 7414, 1072, 11034, 627, 7046, 11133, 6586, 6273, 94, 10417, 51119, 55172, 2302, 322, 6899, 6386, 7057, 5818, 6722, 3383, 10383, 10653, 115908, 2676, 3579, 5268, 64843, 2048, 5328, 976, 2064, 11041, 3397, 6…
	GO:0034330~cell junction organization	20	0.742942	0.00022813	0.037039	57555, 596, 2701, 7414, 2335, 10580, 3690, 84612, 1525, 3915, 3678, 4088, 4359, 10052, 87, 3655, 998, 4092, 88, 7043
	GO:0009790~embryonic development	112	4.16048	0.000296911	0.0462024	7291, 3087, 3280, 3339, 7296, 6423, 56243, 9927, 2295, 7942, 7168, 2294, 4920, 5159, 4488, 6493, 140467, 1382, 3209, 7408, 9542, 1906, 1909, 8313, 472, 4222, 4322, 58495, 5754, 3218, 3219, 3216, 3217, 3214, 51715, 3215, 3213, 2768, 51599, 80864, 1072, 8646, 5801, 283871, 3516, 1649, 3221, 10804, 10018, 1999, 7046, 10019, 7043, 3227, 94, 9421, 2776, 129685, 51119, 320, 7050, 6899, 283987, 3231, 96…
	GO:0007517~muscle organ development	50	1.85736	0.000327737	0.0491043	4209, 783, 3339, 10290, 3479, 1310, 7402, 1525, 7168, 3679, 22801, 4154, 1827, 5159, 79810, 2064, 2065, 1489, 2121, 8626, 7134, 165, 93986, 6876, 126272, 23363, 70, 10052, 11149, 6442, 6443, 5081, 26576, 84159, 2275, 5307, 22808, 6640, 4092, 347273, 9421, 6525, 5532, 26548, 4621, 8912, 8910, 6899, 283078, 6910
	GO:0010646~regulation of cell communication	188	6.98366	0.000331406	0.0479704	26084, 3087, 10342, 9459, 3082, 3479, 6347, 8743, 9927, 1392, 154, 4615, 114898, 154043, 80183, 51776, 8737, 8525, 8878, 9146, 4826, 10140, 8541, 1893, 4215, 3209, 1901, 1906, 27122, 26000, 89846, 408, 7410, 84336, 80824, 8313, 128272, 1000, 64321, 58495, 23637, 8437, 1435, 57555, 5140, 10174, 29775, 51715, 7105, 9628, 55160, 2316, 5045, 8036, 2074, 8651, 2786, 8766, 8646, 7188, 57221, 9910, 8488…
	GO:0014020~primary neural tube formation	14	0.520059	0.000351774	0.0491905	5754, 7291, 7249, 7976, 7408, 5727, 56963, 9839, 7020, 1072, 7050, 585, 9620, 58495
ccRCC	GO:0001775~cell activation	98	3.08661	2.58237e-12	1.25323e-08	7535, 8227, 2147, 942, 2149, 6556, 3683, 3684, 50615, 8320, 3929, 6868, 22904, 11093, 604, 1281, 7409, 388552, 1794, 5027, 5359, 3688, 7551, 4791, 4690, 10320, 7518, 920, 1435, 5971, 928, 10672, 170575, 926, 22918, 7040, 3697, 8440, 102, 100, 5154, 914, 917, 202309, 912, 5341, 3936, 81575, 3937, 2280, 81542, 7534, 51284, 896, 387357, 56253, 148022, 7450, 53335, 10397, 7454, 64581, 57580, 2244, 31…
	GO:0002376~immune system process	254	8	3.31097e-12	8.03419e-09	10346, 10344, 8227, 942, 5371, 944, 8744, 337, 79902, 947, 50615, 8320, 6351, 56241, 6868, 22904, 3929, 2209, 2206, 608, 604, 11326, 930, 207, 6362, 929, 1594, 7076, 4791, 2214, 2213, 10320, 920, 1435, 10871, 6891, 170575, 22918, 6890, 926, 7042, 729, 728, 7040, 919, 8440, 7046, 811, 914, 917, 202309, 2590, 912, 5341, 115362, 3936, 3937, 713, 712, 715, 203068, 51284, 115727, 2821, 10859, 50856, 8…
	GO:0009605~response to external stimulus	235	7.40157	8.32631e-12	1.34692e-08	10344, 6772, 2335, 949, 336, 79902, 948, 8739, 6351, 6868, 7168, 3929, 3485, 59341, 2206, 79602, 6614, 11093, 11326, 23780, 6092, 51090, 388552, 24, 8111, 207, 6362, 1594, 929, 5359, 1591, 5653, 56925, 55558, 6752, 5355, 928, 8761, 7042, 1843, 729, 80856, 728, 7040, 57619, 58484, 8858, 11343, 4232, 7043, 3730, 5898, 229, 1301, 5624, 912, 5341, 5340, 713, 3939, 712, 22915, 715, 611, 51284, 115727,…
	GO:0045321~leukocyte activation	82	2.58268	2.83264e-10	3.4367e-07	7535, 56253, 8227, 387357, 148022, 942, 6556, 53335, 64581, 10397, 7454, 3683, 3684, 57580, 50615, 8320, 22904, 3929, 6868, 3108, 604, 3575, 3576, 2067, 1137, 23210, 3811, 7409, 3614, 1794, 6504, 5027, 3688, 7551, 5788, 3589, 4690, 3662, 5873, 10320, 7518, 920, 1435, 5971, 865, 4683, 150372, 4542, 170575, 868, 22918, 926, 27040, 80329, 3600, 7040, 3697, 8440, 3659, 102, 100, 958, 3574, 9734, 914,…
	GO:0042060~wound healing	69	2.17323	3.93367e-10	3.81802e-07	1001, 2147, 4854, 2149, 6556, 3827, 83872, 7450, 2335, 10544, 949, 7454, 948, 7168, 6868, 2244, 3678, 9002, 1289, 2150, 11093, 2153, 5329, 5265, 5328, 2157, 1281, 2064, 30008, 5588, 308, 388552, 9066, 5359, 5653, 2160, 3589, 8291, 5873, 135, 2934, 3998, 928, 10672, 8761, 6340, 960, 7042, 80856, 6338, 7040, 3172, 3170, 4015, 8858, 7043, 958, 5154, 2776, 4485, 5624, 5467, 5054, 350, 5341, 5340, 316…
	GO:0006955~immune response	180	5.66929	9.50229e-10	7.68576e-07	7535, 10346, 5169, 10344, 683, 2643, 942, 6556, 80380, 944, 8744, 10544, 3683, 10695, 337, 3681, 9450, 8320, 6351, 56241, 22904, 6868, 3929, 2209, 1521, 1520, 2206, 608, 54210, 11326, 3139, 3135, 4688, 9447, 3137, 7409, 9547, 64127, 7940, 6362, 929, 1594, 1511, 54923, 10148, 4791, 5452, 2214, 2213, 3140, 920, 7518, 10871, 5971, 6891, 10673, 926, 6890, 729, 728, 7040, 5806, 3134, 3133, 23586, 100,…
	GO:0007599~hemostasis	45	1.41732	4.52063e-09	3.13408e-06	5873, 135, 2147, 2149, 3998, 83872, 7450, 3827, 10672, 928, 8761, 10544, 7454, 2313, 948, 80856, 3172, 2244, 9002, 2150, 11093, 3170, 2153, 5329, 5265, 8858, 5328, 958, 1281, 2157, 30008, 2776, 308, 388552, 4485, 5624, 5341, 5054, 350, 5340, 5359, 22915, 2160, 2821, 3589
	GO:0048583~regulation of response to stimulus	129	4.06299	6.04794e-09	3.66882e-06	7535, 79001, 2147, 942, 2149, 6556, 5371, 336, 10203, 154, 22904, 6868, 3929, 51776, 8737, 59341, 2206, 2150, 604, 11326, 1281, 930, 1901, 64127, 207, 5367, 1909, 5027, 1616, 1594, 8312, 3142, 2160, 79594, 10673, 6891, 170575, 926, 7042, 729, 7040, 7186, 919, 102, 23586, 100, 5154, 29969, 3014, 5624, 5341, 912, 5054, 5340, 2280, 7052, 9180, 27306, 713, 712, 715, 51284, 79444, 3122, 79184, 387357,…
	GO:0007596~blood coagulation	43	1.35433	6.92027e-09	3.73155e-06	5873, 135, 2147, 2149, 3998, 83872, 7450, 3827, 10672, 928, 8761, 10544, 7454, 948, 80856, 3172, 2244, 9002, 2150, 11093, 3170, 2153, 5329, 5265, 8858, 5328, 958, 1281, 2157, 30008, 2776, 308, 388552, 4485, 5624, 5341, 5054, 350, 5340, 5359, 22915, 2160, 3589
	GO:0050817~coagulation	43	1.35433	6.92027e-09	3.73155e-06	5873, 135, 2147, 2149, 3998, 83872, 7450, 3827, 10672, 928, 8761, 10544, 7454, 948, 80856, 3172, 2244, 9002, 2150, 11093, 3170, 2153, 5329, 5265, 8858, 5328, 958, 1281, 2157, 30008, 2776, 308, 388552, 4485, 5624, 5341, 5054, 350, 5340, 5359, 22915, 2160, 3589
	GO:0051179~localization	615	19.3701	1.14687e-08	5.56576e-06	84275, 338, 222553, 54102, 8120, 1317, 23516, 10991, 5371, 401612, 336, 949, 337, 947, 154, 948, 374291, 118980, 6868, 2857, 10612, 2209, 59341, 2206, 604, 8871, 27072, 23780, 167691, 388552, 80830, 345, 50617, 5364, 207, 409, 929, 6879, 738, 51167, 8411, 23636, 6891, 170575, 5355, 6890, 22918, 57222, 51393, 5349, 22925, 51194, 173, 8440, 627, 58484, 6748, 6746, 514, 348932, 811, 55107, 151473, 5…
	GO:0050793~regulation of developmental process	171	5.38583	2.26973e-08	1.00136e-05	7535, 338, 3087, 1002, 942, 3082, 2335, 5371, 9451, 948, 154, 8320, 51176, 3679, 8877, 79784, 79006, 604, 9657, 9253, 5744, 1284, 6092, 6688, 7940, 3299, 5364, 207, 22985, 5552, 11007, 27329, 5027, 1594, 3688, 10096, 5653, 3910, 3142, 3911, 55558, 9643, 10320, 2620, 7518, 1435, 57154, 9806, 19, 56882, 170575, 10672, 93166, 150465, 7042, 7041, 7040, 57619, 23191, 1840, 7424, 627, 7046, 58480, 100,…
	GO:0006810~transport	545	17.1654	3.11635e-08	1.2603e-05	84275, 338, 222553, 54102, 8120, 1317, 23516, 10991, 5371, 401612, 336, 949, 337, 154, 948, 374291, 118980, 2857, 10612, 2209, 59341, 2206, 604, 27072, 23780, 167691, 388552, 80830, 345, 207, 50617, 409, 929, 6879, 738, 51167, 8411, 23636, 6891, 170575, 5355, 22918, 6890, 57222, 51393, 5349, 22925, 51194, 173, 627, 58484, 6748, 6746, 514, 348932, 811, 55107, 151473, 5243, 55201, 63910, 917, 189, …
	GO:0009611~response to wounding	140	4.40945	3.80395e-08	1.42003e-05	10344, 1001, 2147, 2149, 6556, 8534, 83872, 2335, 10544, 3683, 336, 949, 9450, 948, 6351, 7168, 6868, 3929, 1524, 3678, 1289, 2206, 6614, 2150, 11093, 2153, 11326, 1281, 2157, 23780, 51090, 388552, 8111, 207, 5037, 6362, 5027, 929, 5359, 5653, 2160, 8291, 3998, 10672, 928, 8761, 7042, 729, 80856, 7040, 58484, 5806, 4015, 11343, 8858, 7043, 114548, 5154, 2776, 5624, 5341, 5054, 5340, 713, 712, 229…
	GO:0065008~regulation of biological quality	327	10.2992	4.32105e-08	1.49785e-05	338, 2335, 5371, 336, 949, 337, 5376, 154, 948, 153, 6868, 7168, 54495, 59341, 8877, 79602, 11093, 604, 6494, 120071, 115019, 2014, 5744, 5742, 51090, 388552, 345, 4118, 207, 50617, 5367, 1594, 10092, 5359, 4893, 5653, 10096, 4601, 51167, 2847, 7076, 55558, 1435, 19, 2316, 170575, 3845, 18, 928, 8761, 2313, 4634, 7042, 80856, 728, 7040, 57619, 51196, 627, 8440, 7046, 58480, 8858, 7043, 811, 220, …
	GO:0002274~myeloid leukocyte activation	25	0.787402	5.24896e-08	1.6982e-05	3662, 1435, 148022, 5971, 6556, 4542, 170575, 22918, 10397, 27040, 57580, 7040, 3929, 22904, 102, 3576, 23210, 7462, 3937, 7098, 7099, 7534, 7096, 51284, 4067
	GO:0051234~establishment of localization	548	17.2598	6.01573e-08	1.82463e-05	84275, 338, 222553, 54102, 8120, 1317, 23516, 10991, 5371, 401612, 336, 949, 337, 154, 948, 374291, 118980, 2857, 10612, 2209, 59341, 2206, 604, 27072, 23780, 167691, 388552, 80830, 345, 207, 50617, 409, 929, 6879, 738, 51167, 8411, 23636, 6891, 170575, 5355, 22918, 6890, 57222, 51393, 5349, 22925, 51194, 173, 627, 58484, 6748, 6746, 514, 348932, 811, 55107, 151473, 5243, 55201, 63910, 917, 189, …
	GO:0051239~regulation of multicellular organismal process	221	6.96063	1.0941e-07	3.1233e-05	3087, 942, 3082, 5371, 10203, 336, 337, 154, 153, 6868, 7168, 3929, 51176, 22900, 8877, 604, 11326, 5744, 5742, 6092, 345, 5364, 207, 5367, 1594, 929, 4893, 10096, 3910, 3911, 55655, 7170, 55558, 6752, 10320, 920, 1435, 170575, 3845, 4634, 7042, 150465, 7041, 7040, 7186, 51196, 1840, 627, 7046, 7043, 65078, 811, 914, 5624, 5341, 5340, 81575, 51284, 388585, 3111, 23237, 4660, 4855, 4854, 59307, 38…
	GO:0042221~response to chemical stimulus	287	9.03937	1.87857e-07	5.06471e-05	10344, 338, 6772, 59345, 5371, 949, 336, 337, 79902, 6351, 6868, 7168, 3929, 51176, 3485, 8737, 79602, 2203, 5228, 2329, 2016, 5742, 6092, 23645, 388552, 3716, 207, 6362, 929, 1594, 1591, 5652, 10096, 51167, 2021, 7079, 55558, 23636, 6752, 920, 825, 6891, 5355, 3845, 18, 5352, 252983, 5351, 1843, 7042, 21, 728, 7040, 627, 7046, 4232, 412, 7043, 3730, 220, 5243, 5898, 229, 189, 81575, 9180, 713, 5…
	GO:0002682~regulation of immune system process	105	3.30709	4.36159e-07	0.000111398	7535, 942, 6556, 80380, 5371, 336, 3929, 6868, 2206, 2150, 604, 11326, 1281, 930, 6688, 388552, 64127, 7940, 22985, 5027, 10148, 3142, 4690, 10320, 920, 1435, 10673, 6891, 170575, 926, 7042, 729, 7040, 7186, 919, 8440, 102, 100, 23586, 914, 2778, 796, 912, 2280, 713, 712, 715, 51284, 3122, 387357, 56253, 3111, 148022, 50852, 5914, 64581, 163702, 3624, 4860, 3108, 3575, 1947, 2064, 30009, 5588, 59…
	GO:0006950~response to stress	359	11.3071	1.01179e-06	0.00024548	10344, 6772, 2335, 5371, 336, 949, 337, 27063, 154, 948, 8739, 153, 6351, 3929, 6868, 7168, 64393, 55540, 3485, 51776, 8737, 2209, 59341, 29128, 2206, 6614, 11093, 604, 5228, 11326, 23780, 930, 5742, 51090, 23645, 388552, 8111, 3299, 207, 5367, 6362, 929, 1594, 83605, 5359, 114799, 5653, 84893, 10871, 1453, 1454, 317, 6891, 928, 18, 8761, 6890, 5352, 5351, 51393, 922, 1843, 7042, 729, 80856, 728,…
	GO:0002474~antigen processing and presentation of peptide antigen via MHC class I	13	0.409449	1.5398e-06	0.000355778	811, 3135, 6891, 55080, 51752, 3107, 3106, 567, 3077, 3134, 64167, 3133, 3105, 3140
	GO:0006869~lipid transport	49	1.54331	1.67505e-06	0.000369432	148229, 338, 84634, 949, 336, 337, 10396, 948, 3929, 55911, 6646, 23780, 301, 5322, 123, 24, 80830, 345, 5027, 7436, 4547, 738, 79895, 2760, 51761, 29881, 2168, 19, 201305, 83985, 5825, 114879, 10948, 57198, 80765, 57194, 23250, 388323, 9619, 4481, 857, 10079, 5467, 350, 81575, 79135, 114885, 8435, 134429
	GO:0050878~regulation of body fluid levels	48	1.51181	1.71891e-06	0.000362625	5873, 135, 2147, 2149, 3998, 83872, 7450, 3827, 10672, 928, 8761, 10544, 7454, 2313, 948, 80856, 3172, 2244, 9002, 2150, 6582, 11093, 3170, 2153, 5329, 5265, 8858, 5328, 958, 1281, 2157, 30008, 302, 2776, 308, 388552, 5624, 4485, 5341, 5054, 350, 5340, 5359, 22915, 359, 2160, 2821, 3589
	GO:0048002~antigen processing and presentation of peptide antigen	17	0.535433	1.83337e-06	0.000370654	811, 3111, 3135, 6556, 6891, 55080, 51752, 3107, 3106, 567, 3108, 3077, 3134, 3133, 64167, 3105, 3140, 3122
	GO:0006811~ion transport	181	5.70079	1.88489e-06	0.000365829	133308, 5169, 2147, 6559, 2149, 54102, 6557, 6556, 1317, 1193, 23516, 10991, 79689, 489, 488, 200845, 118980, 114899, 7809, 59341, 6566, 284111, 6561, 1188, 1187, 115019, 23704, 9356, 51090, 9914, 94015, 8685, 50617, 479, 1594, 5027, 81855, 7881, 80036, 6555, 10008, 153201, 266675, 5355, 81033, 55867, 51393, 121601, 83697, 5349, 7421, 6580, 84329, 125206, 245972, 6582, 196527, 6588, 57158, 514, 5…
	GO:0048518~positive regulation of biological process	421	13.2598	2.36025e-06	0.000440454	8881, 338, 942, 2002, 6772, 944, 5371, 146433, 336, 949, 337, 948, 154, 8739, 153, 8320, 6868, 51176, 8737, 22900, 2206, 8877, 85329, 604, 5228, 930, 6092, 79718, 388552, 3299, 207, 5364, 5367, 6879, 929, 10096, 2847, 8312, 2021, 7204, 23636, 920, 1435, 318, 6891, 170575, 1843, 729, 10085, 919, 8440, 627, 58484, 8445, 84883, 412, 811, 220, 914, 912, 5341, 5340, 7321, 713, 712, 715, 203068, 51284,…
	GO:0046649~lymphocyte activation	61	1.92126	3.07125e-06	0.000551876	7535, 8227, 56253, 387357, 942, 6556, 53335, 7454, 3683, 64581, 3684, 50615, 8320, 6868, 3108, 604, 3575, 1137, 2067, 23210, 3811, 7409, 3614, 6504, 1794, 5027, 3688, 5788, 3589, 4690, 5873, 10320, 3662, 7518, 920, 5971, 865, 4683, 150372, 170575, 868, 926, 80329, 3600, 7040, 8440, 3659, 100, 958, 3574, 914, 9734, 917, 202309, 912, 7462, 3936, 355, 2280, 4914, 896
	GO:0010876~lipid localization	51	1.6063	3.64701e-06	0.000631906	148229, 338, 84634, 2583, 949, 336, 337, 10396, 948, 3929, 55911, 6646, 23780, 301, 5322, 123, 24, 80830, 345, 5027, 27329, 7436, 4547, 738, 79895, 2760, 51761, 29881, 2168, 19, 201305, 83985, 5825, 114879, 10948, 57198, 80765, 57194, 23250, 388323, 9619, 4481, 857, 10079, 5467, 350, 81575, 79135, 114885, 8435, 134429
	GO:0007242~intracellular signaling cascade	274	8.62992	3.81929e-06	0.000638935	79705, 6775, 115761, 6772, 3082, 59345, 5371, 10203, 154, 948, 152, 153, 10615, 8737, 51776, 8877, 79602, 6494, 166614, 5744, 3716, 345, 5364, 207, 3718, 28511, 6879, 1591, 83605, 4893, 342667, 2847, 161742, 23636, 6752, 19, 2316, 3845, 1843, 7041, 728, 7186, 51196, 7046, 6478, 8445, 85442, 58480, 7043, 811, 64284, 65266, 5898, 23526, 5341, 7052, 51284, 79444, 115727, 51285, 64283, 8844, 5330, 48…
	GO:0048522~positive regulation of cellular process	384	12.0945	5.15833e-06	0.0008341	4208, 8881, 338, 3087, 55840, 942, 2002, 6772, 944, 5371, 146433, 336, 949, 10203, 337, 154, 948, 8739, 8320, 3929, 6868, 4613, 7168, 64393, 51176, 51776, 8737, 22900, 2206, 8877, 604, 5228, 85329, 5744, 79718, 6092, 388552, 3299, 4118, 207, 5364, 3718, 1594, 6879, 10475, 4893, 5653, 10096, 8312, 3915, 2021, 7076, 55655, 7204, 253738, 6604, 23636, 10320, 920, 1435, 318, 19, 2316, 170575, 3845, 18…
	GO:0002684~positive regulation of immune system process	69	2.17323	5.607e-06	0.000877385	7535, 56253, 387357, 148022, 942, 50852, 6556, 80380, 5914, 64581, 6868, 3929, 4860, 2206, 2150, 3108, 604, 3575, 11326, 1947, 30009, 5588, 930, 388552, 64127, 5027, 8631, 10148, 3142, 5788, 5594, 4690, 10320, 920, 136, 150372, 6891, 10673, 170575, 868, 3902, 1026, 3600, 360, 7042, 729, 7040, 7186, 919, 8440, 102, 100, 958, 3574, 914, 951, 912, 7462, 7098, 713, 6863, 7099, 712, 715, 3566, 51284, …
	GO:0007155~cell adhesion	165	5.19685	5.64211e-06	0.000855297	1003, 1292, 50937, 1001, 1002, 1007, 1296, 1294, 1295, 3339, 2335, 3680, 3683, 949, 337, 3684, 3728, 947, 3681, 948, 488, 57863, 89858, 7060, 6351, 1524, 6868, 51176, 3679, 3678, 1289, 7162, 6614, 11093, 2153, 64098, 1281, 9358, 2157, 29780, 2015, 5175, 6092, 1901, 6402, 27329, 3688, 6404, 3915, 9051, 3910, 3911, 83706, 199731, 920, 22798, 9369, 22795, 928, 22918, 923, 8038, 9223, 7041, 10085, 81…
	GO:0022610~biological adhesion	165	5.19685	6.1094e-06	0.000898051	1003, 1292, 50937, 1001, 1002, 1007, 1296, 1294, 1295, 3339, 2335, 3680, 3683, 949, 337, 3684, 3728, 947, 3681, 948, 488, 57863, 89858, 7060, 6351, 1524, 6868, 51176, 3679, 3678, 1289, 7162, 6614, 11093, 2153, 64098, 1281, 9358, 2157, 29780, 2015, 5175, 6092, 1901, 6402, 27329, 3688, 6404, 3915, 9051, 3910, 3911, 83706, 199731, 920, 22798, 9369, 22795, 928, 22918, 923, 8038, 9223, 7041, 10085, 81…
	GO:0080134~regulation of response to stress	76	2.3937	1.03911e-05	0.00148208	79001, 79184, 56253, 2147, 148022, 2149, 3827, 5371, 64581, 10203, 8841, 163702, 56154, 154, 8771, 10392, 22904, 3929, 8737, 51776, 59341, 2150, 5585, 604, 5328, 302, 23542, 64127, 25939, 7133, 23162, 207, 28988, 9064, 7132, 1909, 1616, 8312, 2160, 60401, 79594, 135, 136, 4542, 170575, 5008, 3902, 51752, 926, 3600, 7042, 2877, 200316, 9479, 23586, 100, 5154, 29969, 3273, 857, 3014, 5624, 5054, 91…
	GO:0042493~response to drug	63	1.98425	1.21814e-05	0.00168762	1001, 6772, 6728, 336, 8841, 6868, 8836, 3485, 4860, 5228, 6731, 2903, 2064, 6648, 4363, 123, 2016, 29988, 388552, 4982, 5037, 5027, 6198, 5652, 2564, 7079, 51471, 8989, 825, 5141, 5870, 4683, 7515, 1371, 18, 1026, 768, 1603, 21, 9027, 7040, 368, 627, 5797, 4131, 4015, 220, 5154, 5243, 146802, 54600, 858, 857, 2778, 2775, 55244, 2180, 6531, 3767, 116085, 7534, 136991, 2869, 4067
	GO:0032879~regulation of localization	145	4.56693	1.39268e-05	0.00187566	338, 2147, 51225, 2149, 6556, 336, 949, 337, 948, 154, 7168, 6868, 22900, 2206, 8877, 2150, 29993, 604, 5742, 1901, 64127, 345, 207, 54521, 8682, 5552, 1909, 27329, 5027, 10913, 4601, 2847, 3910, 3911, 10008, 55655, 55558, 1435, 19, 9627, 2316, 170575, 10672, 7042, 7040, 7424, 10013, 5806, 7046, 102, 6588, 57158, 100, 7043, 114548, 811, 9619, 5154, 29763, 796, 2775, 5340, 491, 3936, 2280, 7223, 5…
	GO:0042110~T cell activation	42	1.32283	1.49247e-05	0.00195566	7535, 5873, 3662, 10320, 920, 7518, 56253, 387357, 5971, 942, 6556, 53335, 170575, 868, 926, 3683, 7454, 64581, 3600, 3684, 8320, 7040, 6868, 8440, 3659, 3108, 3575, 100, 23210, 3574, 7409, 914, 917, 912, 1794, 5027, 3936, 355, 2280, 5788, 896, 4690
	GO:0030199~collagen fibril organization	16	0.503937	1.97722e-05	0.00252196	1281, 1290, 302, 4010, 1301, 5033, 7042, 2296, 50509, 1277, 1289, 9508, 1278, 871, 7046, 4015
	GO:0050865~regulation of cell activation	53	1.66929	2.13125e-05	0.00264856	7535, 3111, 148022, 942, 80380, 5914, 3624, 3929, 4860, 2206, 3108, 604, 3575, 11326, 2064, 1947, 30009, 5588, 388552, 7940, 10148, 3142, 5788, 4690, 10320, 3662, 135, 920, 136, 10673, 150372, 170575, 868, 1029, 3902, 27040, 1026, 3600, 7040, 7186, 8440, 100, 958, 5154, 3574, 914, 5341, 55824, 355, 3162, 6863, 7099, 3566
	GO:0019882~antigen processing and presentation	31	0.976378	2.16767e-05	0.0026265	3111, 3112, 5971, 6556, 6891, 55080, 51752, 10544, 80329, 3107, 3106, 3109, 3108, 3077, 3134, 3133, 3105, 5698, 3139, 3113, 811, 3115, 3135, 3117, 3119, 3137, 912, 5696, 567, 64167, 3122, 3140
	GO:0002263~cell activation during immune response	18	0.566929	2.60233e-05	0.00307557	5873, 5971, 148022, 6556, 4542, 27040, 3683, 7462, 3936, 8320, 22904, 3929, 7098, 7099, 7534, 51284, 4067, 100
	GO:0002366~leukocyte activation during immune response	18	0.566929	2.60233e-05	0.00307557	5873, 5971, 148022, 6556, 4542, 27040, 3683, 7462, 3936, 8320, 22904, 3929, 7098, 7099, 7534, 51284, 4067, 100
	GO:0050776~regulation of immune response	64	2.01575	2.82048e-05	0.00325373	7535, 56253, 387357, 148022, 942, 6556, 5914, 5371, 336, 64581, 163702, 3929, 2206, 3108, 604, 3575, 11326, 1281, 30009, 930, 64127, 25939, 5027, 8631, 3142, 5788, 5594, 3662, 136, 150372, 6891, 10673, 4542, 170575, 3902, 51752, 926, 3600, 7042, 729, 7040, 7186, 919, 2877, 200316, 23586, 100, 958, 951, 912, 7462, 3162, 2280, 7098, 713, 7099, 712, 715, 3566, 51284, 567, 259, 4067, 3122
	GO:0030001~metal ion transport	114	3.59055	3.18404e-05	0.00358713	133308, 2147, 6559, 2149, 6557, 1317, 6556, 23516, 10991, 79689, 489, 488, 200845, 118980, 59341, 284111, 6561, 23704, 9914, 479, 5027, 1594, 7881, 81855, 80036, 10008, 6555, 81033, 51393, 7421, 125206, 6588, 57158, 6568, 6569, 54207, 491, 140803, 493, 2280, 1259, 7223, 7222, 253980, 6261, 2701, 5579, 10246, 6324, 3781, 7126, 3780, 79041, 343450, 3779, 3777, 55089, 55503, 8645, 9498, 9497, 51133,…
	GO:0009595~detection of biotic stimulus	12	0.377953	3.35909e-05	0.00369814	10392, 56253, 114770, 3929, 7098, 7099, 58484, 64127, 64581, 949, 912, 114548
	GO:0043085~positive regulation of catalytic activity	125	3.93701	3.37139e-05	0.00362932	8881, 2147, 2643, 2642, 2149, 6772, 6556, 3082, 5371, 949, 10203, 337, 9451, 154, 152, 153, 7168, 6868, 4929, 51776, 8737, 10487, 22900, 2206, 8877, 5744, 1901, 207, 1909, 5027, 1616, 1594, 2760, 55655, 79594, 7518, 920, 1435, 2168, 317, 10672, 3845, 7042, 4634, 729, 7040, 728, 7186, 27113, 51196, 109, 7421, 58484, 7046, 5699, 114548, 7043, 5698, 22861, 29969, 799, 229, 2776, 796, 2778, 2775, 534…
	GO:0022603~regulation of anatomical structure morphogenesis	62	1.95276	3.84949e-05	0.00405305	1002, 3087, 3082, 2335, 7453, 5371, 10505, 3679, 221472, 8877, 79006, 79784, 773, 2064, 9253, 1284, 5792, 6092, 22846, 3791, 7940, 5364, 4982, 4747, 7132, 5921, 51330, 27329, 10371, 10096, 8829, 55558, 2620, 1435, 136, 56882, 10672, 51752, 7042, 150465, 3984, 7041, 7040, 57619, 23191, 627, 5797, 57194, 4131, 58480, 8522, 65078, 7043, 54873, 226, 9734, 350, 5054, 5340, 3162, 9138, 7533
	GO:0051249~regulation of lymphocyte activation	46	1.44882	4.01308e-05	0.00413523	7535, 3662, 10320, 135, 920, 3111, 148022, 942, 10673, 80380, 150372, 5914, 170575, 868, 3902, 1029, 27040, 1026, 3600, 3624, 7040, 7186, 8440, 4860, 3108, 604, 3575, 100, 11326, 958, 2064, 1947, 30009, 5588, 3574, 914, 388552, 7940, 55824, 355, 6863, 10148, 3142, 3566, 5788, 4690
	GO:0002694~regulation of leukocyte activation	50	1.5748	4.3925e-05	0.00443126	7535, 3111, 148022, 942, 80380, 5914, 3624, 3929, 4860, 2206, 3108, 604, 3575, 11326, 2064, 1947, 30009, 5588, 388552, 7940, 10148, 3142, 5788, 4690, 10320, 3662, 920, 135, 136, 10673, 150372, 868, 1029, 3902, 170575, 27040, 1026, 3600, 7040, 7186, 8440, 100, 958, 3574, 914, 55824, 3162, 355, 6863, 3566
	GO:0006812~cation transport	131	4.12598	4.46764e-05	0.00441511	133308, 2147, 6559, 2149, 6557, 1317, 6556, 23516, 10991, 79689, 489, 488, 200845, 118980, 59341, 284111, 6561, 23704, 9914, 50617, 479, 5027, 1594, 81855, 7881, 80036, 10008, 6555, 153201, 81033, 51393, 7421, 6580, 84329, 125206, 245972, 6582, 6588, 57158, 514, 6568, 6569, 53343, 10312, 54207, 491, 140803, 2280, 493, 1259, 9033, 7223, 7222, 525, 253980, 6261, 2701, 5579, 10246, 6324, 3781, 7126,…
	GO:0051270~regulation of cell motion	56	1.76378	4.59352e-05	0.00444865	84634, 51225, 2149, 949, 6868, 7168, 8877, 2150, 87, 604, 91624, 54567, 5604, 22846, 3791, 1901, 207, 54521, 27329, 6198, 10371, 8829, 5314, 3910, 2113, 55615, 58191, 3911, 55558, 5594, 1435, 1956, 4542, 10672, 1027, 5080, 3909, 7042, 6237, 7040, 7424, 10013, 5797, 7046, 102, 100, 5154, 9734, 6997, 26585, 1012, 350, 5340, 3162, 6863, 4067
	GO:0050818~regulation of coagulation	19	0.598425	5.13185e-05	0.00487153	79001, 2147, 5154, 302, 2149, 3273, 3827, 308, 857, 307, 5624, 5341, 5054, 350, 5340, 7099, 2150, 2160, 5328
	GO:0050867~positive regulation of cell activation	37	1.16535	5.22747e-05	0.00486689	7535, 10320, 920, 148022, 942, 136, 10673, 80380, 5914, 170575, 1026, 3600, 7040, 3929, 7186, 8440, 4860, 2206, 3108, 604, 3575, 100, 958, 1947, 30009, 5588, 3574, 914, 388552, 5341, 6863, 7099, 10148, 3142, 3566, 5788, 4690
	GO:0050790~regulation of catalytic activity	188	5.92126	5.2454e-05	0.00479161	8881, 79706, 2147, 2643, 2149, 2642, 6772, 6556, 3082, 83874, 5371, 10203, 949, 336, 337, 55181, 9451, 154, 152, 153, 7168, 6868, 80183, 51776, 4929, 8737, 10487, 22900, 2206, 8877, 604, 64744, 5744, 7409, 1901, 4298, 345, 207, 9744, 1909, 27329, 1594, 6879, 5027, 1616, 2847, 84335, 2760, 5934, 55655, 161742, 79594, 6752, 23636, 920, 7518, 1435, 2168, 317, 2316, 10672, 3845, 1122, 7042, 4634, 729…
	GO:0030198~extracellular matrix organization	35	1.10236	6.96932e-05	0.006244	1292, 1290, 1296, 9806, 133584, 3339, 7042, 2295, 7448, 2296, 284013, 1289, 9508, 151887, 7046, 7045, 54507, 4015, 1281, 302, 1284, 4010, 1301, 5033, 4982, 169611, 2280, 4811, 3915, 50509, 1277, 4791, 1278, 871, 3958
	GO:0042981~regulation of apoptosis	179	5.6378	7.34551e-05	0.00646069	4208, 2147, 2643, 2149, 6772, 9459, 3082, 3875, 330, 944, 5371, 9451, 154, 8739, 2296, 6868, 64393, 51776, 4929, 8737, 22900, 8877, 604, 85329, 84944, 7409, 64127, 4118, 207, 8682, 79156, 5027, 1616, 4893, 51765, 84335, 2021, 55655, 1613, 7204, 79594, 23636, 7518, 318, 317, 10673, 170575, 2071, 3845, 5046, 2073, 7042, 1843, 729, 7188, 7040, 7186, 27113, 7421, 10013, 627, 58484, 7046, 8445, 84883,…
	GO:0009966~regulation of signal transduction	193	6.07874	8.01979e-05	0.00692619	3087, 3082, 154, 152, 6868, 3929, 8737, 51776, 3485, 51176, 22900, 604, 6494, 207, 1594, 10475, 4893, 5653, 8312, 128272, 7204, 161742, 23636, 920, 1435, 2316, 3845, 7042, 7041, 25771, 7188, 7040, 728, 7186, 51196, 1840, 8440, 7046, 85442, 7043, 811, 55738, 23624, 5341, 23527, 7052, 115727, 79444, 64283, 23102, 841, 57480, 59307, 50852, 23232, 847, 8841, 57580, 3624, 54662, 25894, 221472, 50861, …
	GO:0045597~positive regulation of cell differentiation	63	1.98425	8.29259e-05	0.00703577	7535, 338, 1002, 942, 5914, 64778, 285590, 948, 3624, 8320, 4860, 79006, 3108, 3575, 5601, 9253, 5792, 5604, 6092, 5925, 3299, 207, 5364, 22985, 4747, 51330, 1594, 10096, 3142, 2113, 9643, 5788, 10320, 7518, 1435, 760, 170575, 1749, 5080, 7042, 3984, 7041, 7040, 1030, 7424, 627, 4131, 3170, 100, 7043, 3574, 4481, 2778, 796, 2736, 655, 5467, 2737, 3976, 9138, 118738, 3566, 4067
	GO:0044093~positive regulation of molecular function	136	4.28346	8.68051e-05	0.0072372	8881, 2147, 2643, 2642, 2149, 6772, 6556, 3082, 5371, 949, 10203, 337, 9451, 154, 152, 153, 7168, 6868, 4929, 51776, 8737, 10487, 22900, 2206, 8877, 5744, 1901, 64127, 207, 1909, 5027, 1616, 1594, 2760, 55655, 79594, 920, 7518, 1435, 2168, 317, 10672, 3845, 7042, 4634, 729, 7040, 728, 7186, 27113, 51196, 7421, 109, 58484, 7046, 5699, 114548, 7043, 5698, 22861, 29969, 799, 229, 2776, 796, 2778, 27…
	GO:0006968~cellular defense response	24	0.755906	9.11088e-05	0.00746641	135, 4332, 10871, 3135, 3823, 4688, 10312, 50852, 4046, 136, 930, 3822, 6891, 3702, 922, 5551, 3688, 728, 1235, 3929, 1524, 23601, 11126, 7369
	GO:0022604~regulation of cell morphogenesis	41	1.29134	9.47392e-05	0.0076339	2620, 1002, 56882, 10672, 2335, 10505, 150465, 7042, 3984, 7041, 7040, 57619, 23191, 3679, 221472, 79006, 79784, 57194, 4131, 8522, 58480, 65078, 7043, 773, 9253, 54873, 5792, 226, 6092, 3791, 7940, 5364, 4747, 5921, 51330, 10371, 8829, 10096, 9138, 7533, 55558
	GO:0002696~positive regulation of leukocyte activation	35	1.10236	0.000106698	0.00845317	7535, 10320, 920, 148022, 942, 136, 10673, 80380, 5914, 170575, 1026, 3600, 7040, 3929, 7186, 8440, 4860, 2206, 3108, 604, 3575, 100, 958, 1947, 30009, 5588, 3574, 914, 388552, 6863, 10148, 3142, 3566, 5788, 4690
	GO:0051094~positive regulation of developmental process	73	2.29921	0.000108722	0.00847449	7535, 338, 1002, 942, 5914, 64778, 285590, 948, 154, 3624, 8320, 4860, 8877, 79006, 3108, 3575, 5601, 9253, 5792, 5604, 6092, 5925, 3299, 207, 5364, 22985, 4747, 7132, 51330, 27329, 5027, 1594, 6198, 10096, 3142, 2113, 9643, 5788, 10320, 7518, 1435, 760, 170575, 1749, 51752, 5080, 7042, 3984, 7041, 7040, 1030, 7424, 627, 4131, 8717, 3170, 100, 7043, 3574, 4481, 9734, 2778, 796, 2736, 655, 5467, 2…
	GO:0030193~regulation of blood coagulation	17	0.535433	0.000111603	0.00856057	79001, 2147, 5154, 302, 2149, 3273, 3827, 857, 5624, 5341, 5054, 350, 5340, 7099, 2150, 2160, 5328
	GO:0043067~regulation of programmed cell death	179	5.6378	0.000126526	0.00954899	4208, 2147, 2643, 2149, 6772, 9459, 3082, 3875, 330, 944, 5371, 9451, 154, 8739, 2296, 6868, 64393, 51776, 4929, 8737, 22900, 8877, 604, 85329, 84944, 7409, 64127, 4118, 207, 8682, 79156, 5027, 1616, 4893, 51765, 84335, 2021, 55655, 1613, 7204, 79594, 23636, 7518, 318, 317, 10673, 170575, 2071, 3845, 5046, 2073, 7042, 1843, 729, 7188, 7040, 7186, 27113, 7421, 10013, 627, 58484, 7046, 8445, 84883,…
	GO:0048731~system development	460	14.4882	0.000126657	0.0094124	338, 5371, 336, 7348, 5376, 8320, 6868, 10612, 51176, 79602, 604, 5228, 6493, 2200, 55224, 6092, 2016, 388552, 3299, 207, 5364, 50617, 5367, 8728, 10096, 825, 920, 1435, 27185, 317, 170575, 928, 5351, 150465, 51196, 1840, 627, 51294, 412, 55107, 811, 220, 1306, 55201, 1301, 321, 912, 5341, 5340, 713, 203068, 525, 2001, 2821, 388585, 841, 387357, 840, 7450, 27164, 8841, 7454, 846, 9201, 10655, 224…
	GO:0001944~vasculature development	67	2.11024	0.000128399	0.00939739	1003, 338, 841, 4855, 2701, 8841, 2296, 2246, 3679, 1289, 3200, 5228, 5328, 3576, 1281, 10163, 23210, 302, 1948, 54567, 633, 3791, 634, 1901, 25976, 207, 5921, 1909, 51330, 27329, 57125, 83605, 8828, 8829, 58504, 1277, 3910, 3911, 1278, 10052, 4643, 23129, 5310, 10672, 51752, 960, 1950, 7042, 1890, 7424, 7046, 4015, 1306, 5154, 7857, 1464, 857, 796, 6997, 1012, 23493, 81575, 3162, 5396, 7052, 801…
	GO:0042325~regulation of phosphorylation	111	3.49606	0.000142085	0.0102396	79706, 2147, 2149, 6556, 3082, 146433, 55181, 154, 152, 6868, 8737, 51776, 8877, 2206, 64127, 4298, 207, 116496, 5037, 1909, 1616, 5027, 6879, 8312, 84335, 5934, 161742, 79594, 23636, 920, 1435, 3845, 923, 7042, 7040, 728, 7186, 51196, 109, 7424, 8440, 7046, 7043, 392255, 5154, 29969, 796, 23624, 2280, 994, 5575, 894, 79444, 896, 84634, 113, 6464, 22933, 5062, 2911, 3624, 80310, 1154, 5585, 2064,…
	GO:0009967~positive regulation of signal transduction	76	2.3937	0.000149129	0.0105873	7535, 841, 3087, 148022, 2149, 50852, 847, 154, 10392, 3929, 8772, 6868, 8737, 2064, 1893, 27032, 23542, 64127, 834, 7132, 5037, 10769, 5027, 1594, 3956, 10475, 4893, 5653, 8312, 60401, 5788, 3589, 79594, 23636, 920, 1435, 4684, 1889, 7105, 2316, 150372, 3845, 5008, 1950, 51026, 7042, 2697, 7041, 7188, 7040, 1030, 10013, 7046, 8717, 100, 7043, 392255, 958, 3059, 858, 857, 655, 5467, 1012, 2280, 3…
	GO:0046903~secretion	77	2.4252	0.000152594	0.0106759	2054, 84634, 2642, 9380, 3827, 94121, 9451, 27445, 10652, 286, 59341, 8645, 2206, 1188, 1187, 773, 302, 301, 5322, 388552, 8938, 50617, 8448, 379, 5027, 79158, 51167, 81693, 134957, 5873, 135, 23256, 3993, 54536, 9369, 760, 19, 136, 10673, 4542, 6340, 5046, 27040, 768, 6344, 360, 6338, 363, 10566, 3758, 627, 58484, 6582, 114548, 7827, 6810, 85409, 7857, 115111, 63910, 6853, 189, 6854, 2778, 10686…
	GO:0045595~regulation of cell differentiation	116	3.65354	0.000154789	0.0106748	7535, 338, 1002, 942, 948, 8320, 79006, 604, 9657, 9253, 5744, 6092, 6688, 3299, 207, 5364, 22985, 11007, 1594, 3688, 5653, 10096, 3142, 55558, 9643, 10320, 7518, 1435, 9806, 19, 170575, 93166, 150465, 7042, 7041, 7040, 1840, 7424, 627, 7046, 100, 65078, 7043, 811, 9619, 914, 2776, 2778, 796, 81575, 894, 7533, 118738, 388585, 3111, 4855, 4854, 5914, 64778, 8841, 285590, 10505, 3624, 4860, 3108, 1…
	GO:0010941~regulation of cell death	179	5.6378	0.000155075	0.0105445	4208, 2147, 2643, 2149, 6772, 9459, 3082, 3875, 330, 944, 5371, 9451, 154, 8739, 2296, 6868, 64393, 51776, 4929, 8737, 22900, 8877, 604, 85329, 84944, 7409, 64127, 4118, 207, 8682, 79156, 5027, 1616, 4893, 51765, 84335, 2021, 55655, 1613, 7204, 79594, 23636, 7518, 318, 317, 10673, 170575, 2071, 3845, 5046, 2073, 7042, 1843, 729, 7188, 7040, 7186, 27113, 7421, 10013, 627, 58484, 7046, 8445, 84883,…
	GO:0006820~anion transport	43	1.35433	0.000168698	0.0113072	5169, 6559, 54102, 6557, 6556, 1193, 83959, 55867, 65010, 6521, 363, 83697, 5349, 114899, 23155, 7809, 9498, 6566, 284111, 9497, 1188, 6561, 6568, 1187, 55107, 9376, 115019, 6569, 9356, 115111, 65266, 10864, 142680, 858, 10861, 8685, 7439, 10550, 116085, 7263, 2564, 6555, 136991
	GO:0051128~regulation of cellular component organization	109	3.43307	0.0001699	0.0112323	8881, 1002, 6556, 2335, 5371, 336, 949, 7168, 3679, 1289, 29993, 79006, 79784, 9253, 6092, 1901, 7940, 345, 207, 5364, 5037, 10092, 5027, 6879, 10096, 55558, 4690, 2620, 56882, 10672, 1786, 150465, 7042, 7041, 7040, 57619, 23191, 10013, 8440, 11346, 9168, 7046, 5806, 58480, 65078, 7043, 57159, 84722, 811, 5154, 29763, 54873, 5898, 226, 51119, 5341, 7429, 25913, 7533, 84634, 10247, 10580, 64581, 9…
	GO:0006468~protein amino acid phosphorylation	150	4.72441	0.000178937	0.0116673	7535, 54101, 284656, 57172, 51225, 79705, 2147, 84930, 6775, 2149, 6772, 10549, 3082, 5371, 157, 9451, 152, 51776, 8737, 84206, 166614, 1326, 3716, 207, 3718, 5027, 1616, 51765, 1613, 56924, 7204, 79594, 1457, 1436, 1453, 8550, 1452, 1454, 2071, 5616, 2268, 923, 341676, 283455, 7042, 728, 7040, 51196, 9020, 10110, 7046, 102, 8445, 23097, 375449, 57551, 7043, 392255, 695, 29969, 79834, 65266, 1409…
	GO:0007431~salivary gland development	9	0.283465	0.000180681	0.0116242	7042, 10913, 7040, 1956, 29842, 3911, 5080, 655, 7043
	GO:0006082~organic acid metabolic process	129	4.06299	0.000184806	0.0117325	113451, 2643, 36, 1579, 34, 10993, 51179, 114899, 23464, 57038, 6566, 125061, 10157, 79602, 8529, 2203, 4199, 1892, 5742, 1382, 5033, 54898, 5034, 80221, 79152, 27329, 9056, 1615, 5832, 30, 123876, 23475, 11000, 549, 2166, 1610, 3995, 5351, 58510, 2271, 3033, 6470, 1644, 11136, 23428, 112487, 3945, 220, 594, 95, 8565, 29968, 26275, 8560, 229, 189, 80150, 7915, 2180, 3939, 27306, 2821, 2182, 13001…
	GO:0001568~blood vessel development	65	2.04724	0.000197034	0.0123427	1003, 338, 841, 4855, 2701, 8841, 2296, 2246, 3679, 1289, 3200, 5228, 5328, 3576, 1281, 10163, 302, 23210, 54567, 633, 3791, 634, 1901, 25976, 207, 5921, 1909, 51330, 27329, 57125, 83605, 8828, 8829, 58504, 1277, 3910, 3911, 1278, 10052, 4643, 23129, 5310, 10672, 51752, 960, 1950, 7042, 1890, 7424, 7046, 4015, 1306, 5154, 7857, 1464, 857, 6997, 1012, 23493, 81575, 3162, 5396, 7052, 80155, 2821
	GO:0007265~Ras protein signal transduction	34	1.07087	0.000206227	0.0127503	19, 6464, 3845, 10672, 27040, 3984, 6237, 9046, 51196, 79930, 10750, 58480, 4650, 10256, 10163, 391, 393, 5898, 392, 5604, 11186, 345, 1012, 28988, 1796, 9402, 4893, 9138, 5595, 397, 1278, 4914, 5594, 8844
	GO:0006519~cellular amino acid and derivative metabolic process	87	2.74016	0.000221165	0.0134959	113451, 2643, 570, 7453, 34, 336, 10993, 337, 8833, 54498, 8836, 23464, 4929, 2673, 57038, 29958, 8974, 125061, 26227, 133121, 10157, 5130, 773, 27034, 2903, 2571, 6648, 8875, 55224, 635, 5322, 5033, 5034, 79814, 1757, 4552, 445, 1615, 9056, 5832, 440, 11240, 7172, 670, 586, 549, 2058, 1610, 51557, 9627, 18, 3029, 5184, 5351, 58510, 7042, 1807, 3172, 6470, 4947, 1644, 11136, 8140, 23428, 112487, …
	GO:0042116~macrophage activation	10	0.314961	0.000221347	0.0133392	22904, 3929, 148022, 7098, 23210, 7099, 6556, 51284, 7096, 22918
	GO:0051493~regulation of cytoskeleton organization	41	1.29134	0.000230661	0.0137262	84634, 2934, 4542, 1027, 7168, 10013, 8440, 11078, 10300, 11346, 9168, 4133, 4130, 4131, 57159, 84722, 5154, 91624, 6712, 5588, 50861, 6710, 1901, 858, 857, 51119, 5341, 7429, 5921, 10092, 5027, 79929, 10552, 6863, 10096, 55704, 136991, 10109, 51474, 4281, 4690
	GO:0002275~myeloid cell activation during immune response	11	0.346457	0.000233196	0.013708	22904, 3929, 148022, 7098, 7099, 7534, 4542, 51284, 27040, 4067, 7462
	GO:0043062~extracellular structure organization	47	1.48031	0.000236786	0.0137511	1292, 10243, 1290, 1296, 9369, 9806, 2149, 133584, 56130, 3339, 288, 7042, 2295, 7448, 56126, 2296, 284013, 56122, 1289, 9508, 151887, 7046, 7045, 54507, 4131, 4015, 773, 2064, 1281, 302, 1284, 4010, 1301, 5033, 4982, 57502, 491, 169611, 2280, 4811, 3915, 50509, 1277, 4791, 1278, 871, 3958
	GO:0015698~inorganic anion transport	31	0.976378	0.000236981	0.0135996	5169, 6559, 54102, 6557, 1193, 6556, 83959, 65010, 363, 114899, 5349, 23155, 7809, 9497, 6561, 1188, 1187, 55107, 6568, 115019, 6569, 115111, 65266, 142680, 858, 10861, 8685, 7439, 7263, 2564, 136991
	GO:0043436~oxoacid metabolic process	127	4	0.000304023	0.0172107	113451, 2643, 36, 1579, 34, 10993, 51179, 114899, 23464, 57038, 6566, 125061, 10157, 79602, 8529, 2203, 4199, 1892, 5742, 1382, 5033, 54898, 5034, 80221, 79152, 27329, 9056, 1615, 5832, 30, 123876, 23475, 11000, 549, 2166, 1610, 3995, 5351, 58510, 2271, 3033, 6470, 1644, 11136, 23428, 112487, 3945, 220, 594, 95, 8565, 29968, 26275, 8560, 229, 189, 80150, 7915, 2180, 3939, 27306, 2821, 2182, 13001…
	GO:0019752~carboxylic acid metabolic process	127	4	0.000304023	0.0172107	113451, 2643, 36, 1579, 34, 10993, 51179, 114899, 23464, 57038, 6566, 125061, 10157, 79602, 8529, 2203, 4199, 1892, 5742, 1382, 5033, 54898, 5034, 80221, 79152, 27329, 9056, 1615, 5832, 30, 123876, 23475, 11000, 549, 2166, 1610, 3995, 5351, 58510, 2271, 3033, 6470, 1644, 11136, 23428, 112487, 3945, 220, 594, 95, 8565, 29968, 26275, 8560, 229, 189, 80150, 7915, 2180, 3939, 27306, 2821, 2182, 13001…
	GO:0019220~regulation of phosphate metabolic process	113	3.55906	0.000308542	0.0172631	79706, 2147, 2149, 6556, 3082, 146433, 55181, 154, 152, 6868, 8737, 51776, 80183, 2206, 8877, 64127, 4298, 207, 116496, 5037, 1909, 1616, 5027, 6879, 8312, 84335, 5934, 161742, 79594, 23636, 920, 1435, 3845, 923, 7042, 7040, 728, 7186, 51196, 109, 7424, 8440, 7046, 7043, 392255, 5154, 29969, 796, 23624, 5341, 2280, 994, 5575, 894, 79444, 896, 84634, 113, 6464, 22933, 5062, 2911, 3624, 80310, 1154…
	GO:0051174~regulation of phosphorus metabolic process	113	3.55906	0.000308542	0.0172631	79706, 2147, 2149, 6556, 3082, 146433, 55181, 154, 152, 6868, 8737, 51776, 80183, 2206, 8877, 64127, 4298, 207, 116496, 5037, 1909, 1616, 5027, 6879, 8312, 84335, 5934, 161742, 79594, 23636, 920, 1435, 3845, 923, 7042, 7040, 728, 7186, 51196, 109, 7424, 8440, 7046, 7043, 392255, 5154, 29969, 796, 23624, 5341, 2280, 994, 5575, 894, 79444, 896, 84634, 113, 6464, 22933, 5062, 2911, 3624, 80310, 1154…
	GO:0009308~amine metabolic process	96	3.02362	0.000311578	0.0172328	89792, 113451, 11227, 2643, 570, 8534, 7453, 34, 336, 10993, 337, 8833, 2296, 8836, 114770, 54498, 23464, 4929, 2673, 57038, 8877, 29958, 8974, 125061, 26227, 133121, 10157, 5130, 55501, 773, 27034, 2903, 2571, 55224, 635, 5322, 633, 5033, 5034, 26, 79814, 1757, 4552, 445, 9056, 1615, 5832, 440, 11240, 586, 549, 2058, 1610, 51557, 64131, 133584, 64132, 9627, 18, 5184, 5351, 58510, 7042, 1807, 317…
	GO:0010627~regulation of protein kinase cascade	65	2.04724	0.000319842	0.0174867	841, 148022, 2149, 847, 8841, 2911, 154, 10392, 8772, 8737, 51776, 22900, 5585, 2064, 1893, 27032, 23542, 64127, 834, 207, 23162, 28988, 9064, 7132, 5037, 1616, 10769, 5027, 3956, 10475, 8312, 7128, 60401, 5788, 3589, 79594, 23636, 5972, 7105, 2316, 5008, 51026, 7042, 2697, 7188, 7040, 3172, 9479, 7046, 8717, 958, 3059, 29969, 857, 5467, 3162, 2280, 7052, 7098, 3976, 7099, 259, 79444, 4067, 10783
	GO:0042180~cellular ketone metabolic process	129	4.06299	0.000325023	0.0175696	79001, 113451, 2643, 36, 1579, 34, 10993, 51179, 114899, 23464, 57038, 6566, 125061, 10157, 79602, 8529, 2203, 4199, 1892, 5742, 1382, 5033, 54898, 5034, 80221, 79152, 27329, 9056, 1615, 5832, 30, 123876, 23475, 11000, 549, 2166, 1610, 3995, 5351, 58510, 2271, 3033, 6470, 1644, 11136, 23428, 112487, 3945, 220, 594, 95, 8565, 29968, 26275, 8560, 229, 189, 80150, 7915, 2180, 3939, 27306, 2821, 2182…
	GO:0007588~excretion	22	0.692913	0.000349397	0.0186671	1187, 135, 136, 9380, 3827, 6340, 55243, 10686, 50617, 6344, 360, 6338, 3162, 363, 100131098, 3758, 359, 81693, 8645, 1188, 525, 7827
	GO:0033674~positive regulation of kinase activity	61	1.92126	0.000360706	0.0190559	84634, 2149, 113, 6464, 6556, 3082, 2911, 154, 152, 6868, 8737, 51776, 1154, 8877, 2206, 5585, 2064, 5604, 207, 23162, 28988, 9064, 1909, 1616, 5027, 7436, 5314, 55704, 5788, 79594, 135, 920, 1435, 2357, 1956, 136, 1609, 3845, 1608, 1950, 7042, 7040, 728, 7186, 51196, 109, 5208, 7046, 7043, 3672, 29969, 796, 6997, 994, 7098, 5575, 894, 79444, 9463, 10451, 896
	GO:0048584~positive regulation of response to stimulus	62	1.95276	0.000372151	0.0194431	7535, 79184, 56253, 387357, 148022, 6556, 64581, 10392, 6868, 3929, 2150, 3108, 11326, 3576, 930, 23542, 3791, 1901, 64127, 5367, 7132, 1909, 5027, 1594, 8312, 8631, 60401, 5788, 5594, 136, 6891, 10673, 3603, 150372, 170575, 5008, 3902, 3600, 7042, 729, 7040, 7186, 919, 102, 100, 7857, 3014, 1012, 912, 7462, 9180, 7052, 7098, 713, 6863, 7099, 712, 715, 51284, 567, 4067, 3122
	GO:0050863~regulation of T cell activation	36	1.13386	0.00038853	0.0200743	7535, 3662, 10320, 135, 920, 3111, 942, 10673, 80380, 5914, 170575, 3902, 868, 1029, 27040, 3600, 7040, 7186, 8440, 4860, 3108, 604, 3575, 100, 11326, 2064, 1947, 5588, 3574, 914, 55824, 10148, 3142, 3566, 5788, 4690
	GO:0050896~response to stimulus	663	20.8819	0.000394274	0.0201536	338, 641649, 942, 6772, 59345, 944, 8744, 5371, 949, 336, 337, 27063, 154, 948, 8739, 8320, 153, 6351, 22904, 6868, 3485, 8737, 2209, 51176, 59341, 29128, 2206, 608, 79602, 2203, 11093, 5228, 604, 23780, 930, 6092, 2016, 23645, 388552, 8111, 3299, 207, 5367, 6362, 409, 929, 5359, 10096, 2847, 51167, 2021, 84893, 11081, 2214, 2213, 6752, 23636, 920, 825, 10871, 317, 6891, 5355, 928, 8761, 6890, 92…
	GO:0010647~positive regulation of cell communication	81	2.55118	0.000421266	0.0212946	7535, 841, 3087, 84634, 148022, 50852, 2149, 847, 154, 10392, 3929, 8772, 6868, 2893, 8737, 2064, 1893, 27032, 23542, 64127, 834, 7132, 5037, 10769, 5027, 1594, 3956, 10475, 4893, 5653, 8312, 60401, 5788, 3589, 79594, 23636, 135, 920, 1435, 4684, 1889, 1956, 7105, 2316, 150372, 3845, 5008, 1950, 51026, 7042, 2697, 7041, 7188, 7040, 1030, 10013, 7046, 8717, 100, 7043, 392255, 958, 3059, 858, 857, …
	GO:0045860~positive regulation of protein kinase activity	59	1.85827	0.000431775	0.0215952	84634, 2149, 113, 6464, 6556, 3082, 2911, 154, 152, 6868, 51776, 8737, 1154, 8877, 2206, 5585, 2064, 5604, 207, 23162, 28988, 9064, 1909, 1616, 5027, 7436, 5314, 55704, 5788, 79594, 135, 920, 1435, 2357, 1956, 136, 1609, 3845, 1608, 1950, 7042, 728, 7040, 7186, 51196, 109, 7046, 7043, 3672, 29969, 796, 6997, 994, 7098, 5575, 894, 79444, 9463, 896
	GO:0010033~response to organic substance	158	4.97638	0.000434295	0.0214985	79001, 1292, 338, 3148, 2643, 2149, 2642, 6772, 6556, 59345, 5371, 336, 949, 9451, 6868, 3929, 51176, 3485, 4929, 8737, 79602, 2203, 5228, 4199, 1281, 9356, 29988, 5742, 23645, 64127, 207, 5037, 6402, 1909, 5551, 5027, 1594, 929, 5652, 10096, 2021, 1277, 7079, 5935, 871, 23636, 920, 2625, 5972, 7515, 6891, 18, 3845, 3311, 252983, 3316, 7042, 1843, 2791, 7040, 109, 54331, 10013, 7046, 102, 412, 40…
	GO:0045580~regulation of T cell differentiation	20	0.629921	0.000435279	0.0213291	10320, 3662, 7535, 2064, 3111, 942, 3574, 914, 1029, 5914, 170575, 3600, 4860, 3142, 3566, 3108, 604, 100, 3575, 5788
	GO:0010646~regulation of cell communication	218	6.86614	0.000437851	0.0212394	3087, 3082, 154, 152, 6868, 3929, 51176, 3485, 8737, 51776, 22900, 604, 6494, 207, 5367, 1594, 10475, 4893, 5653, 8312, 128272, 7204, 161742, 23636, 920, 1435, 2316, 3845, 7042, 7041, 25771, 7188, 7040, 728, 7186, 51196, 1840, 8440, 627, 7046, 85442, 7043, 811, 55738, 23624, 5341, 23527, 7052, 115727, 79444, 64283, 23102, 841, 23237, 57480, 59307, 50852, 23232, 847, 3625, 8841, 57580, 3624, 2899,…
	GO:0044106~cellular amine metabolic process	76	2.3937	0.000442197	0.0212358	113451, 2643, 570, 7453, 34, 10993, 336, 337, 8833, 54498, 8836, 23464, 4929, 2673, 57038, 29958, 26227, 125061, 133121, 10157, 5130, 773, 27034, 2903, 2571, 55224, 5322, 635, 79814, 1757, 4552, 445, 1615, 9056, 5832, 440, 11240, 586, 549, 2058, 1610, 51557, 9627, 5184, 5351, 58510, 7042, 1807, 3172, 6470, 4947, 1644, 11136, 8140, 23428, 112487, 5860, 2348, 594, 95, 8565, 29968, 2731, 26275, 189,…
	GO:0007264~small GTPase mediated signal transduction	76	2.3937	0.000442197	0.0212358	79705, 6464, 115761, 23551, 5911, 9046, 54769, 10750, 4650, 376267, 10163, 5881, 5604, 83452, 373, 345, 11186, 1796, 28988, 28511, 9402, 379, 4893, 375, 2664, 8826, 5595, 6016, 1278, 5594, 5873, 5870, 10044, 51715, 19, 3845, 10672, 57111, 27040, 11031, 57514, 9363, 51655, 9771, 3984, 6237, 51196, 79930, 10900, 6478, 85442, 58480, 64284, 10256, 391, 390, 393, 10981, 5898, 392, 116986, 65997, 6236,…
	GO:0043408~regulation of MAPKKK cascade	34	1.07087	0.00044313	0.0210717	2149, 5972, 5008, 8841, 2911, 154, 7042, 10392, 51776, 8737, 9479, 5585, 2064, 29969, 23542, 64127, 857, 28988, 23162, 207, 9064, 5037, 1616, 5027, 7098, 3976, 7099, 8312, 79444, 259, 60401, 5788, 3589, 79594
	GO:0008284~positive regulation of cell proliferation	98	3.08661	0.000451862	0.0212742	7535, 942, 2149, 6772, 80380, 146433, 10203, 154, 6868, 4613, 10135, 8877, 3200, 5228, 604, 5744, 1901, 3299, 3688, 4893, 3915, 10148, 3142, 7076, 4690, 7518, 1435, 2168, 10673, 3845, 57804, 7042, 7188, 7040, 7424, 7423, 8440, 102, 7046, 100, 5967, 412, 811, 391, 5154, 10312, 23493, 994, 9180, 7052, 116039, 894, 6489, 4855, 148022, 6464, 2246, 4860, 3594, 1947, 2064, 5588, 3791, 6504, 6198, 8829,…
	GO:0045619~regulation of lymphocyte differentiation	23	0.724409	0.000457991	0.0213526	10320, 3662, 7535, 2064, 3111, 942, 3574, 150372, 914, 1029, 5914, 170575, 3600, 3624, 355, 4860, 3142, 3566, 3108, 604, 100, 3575, 5788
	GO:0048856~anatomical structure development	489	15.4016	0.00046276	0.0213674	338, 5371, 336, 7348, 5376, 8320, 6351, 6868, 10612, 51176, 79602, 5228, 604, 6493, 2200, 55224, 6092, 2016, 388552, 3299, 207, 5364, 50617, 5367, 8728, 10096, 825, 920, 1435, 27185, 317, 170575, 928, 8038, 5351, 150465, 80856, 51196, 1840, 627, 51294, 412, 811, 55107, 220, 1306, 55201, 1301, 917, 5341, 321, 912, 5340, 713, 203068, 525, 2001, 2821, 388585, 387357, 841, 840, 7450, 27164, 8841, 745…
	GO:0043065~positive regulation of apoptosis	101	3.1811	0.000489916	0.0223944	2643, 9459, 6772, 5371, 944, 154, 8739, 64393, 8737, 51776, 85329, 604, 7409, 4118, 207, 79156, 1616, 5027, 2021, 1613, 7204, 79594, 318, 2071, 1843, 7042, 729, 7040, 7186, 27113, 7421, 10013, 58484, 7046, 8445, 84883, 114548, 7043, 220, 695, 22861, 393, 914, 5340, 7052, 10285, 26471, 203068, 3428, 23385, 56253, 841, 148022, 3827, 57580, 3624, 1051, 10392, 8772, 83941, 221472, 5326, 5601, 2903, 6…
	GO:0032101~regulation of response to external stimulus	45	1.41732	0.00050782	0.0229871	79001, 135, 2147, 2149, 136, 3603, 3827, 5008, 10203, 154, 7040, 22904, 6868, 3929, 2877, 2150, 102, 604, 100, 5328, 3576, 7857, 5154, 302, 3273, 3791, 1901, 857, 5624, 7133, 26585, 1012, 5341, 5054, 350, 7132, 5340, 1909, 1594, 9180, 7052, 6531, 6863, 7099, 2160
	GO:0001932~regulation of protein amino acid phosphorylation	48	1.51181	0.000523101	0.0234521	920, 2147, 1956, 5008, 146433, 1950, 923, 80310, 7040, 3172, 6868, 51776, 8737, 7424, 9479, 5585, 7046, 7043, 392255, 5154, 29969, 3059, 64127, 857, 6997, 655, 28988, 23162, 9064, 116496, 5037, 1909, 1616, 5027, 2280, 3976, 7099, 8312, 5575, 894, 11069, 55704, 79444, 4067, 5788, 3589, 896, 79594
	GO:0051251~positive regulation of lymphocyte activation	31	0.976378	0.000532055	0.0236307	10320, 7535, 920, 148022, 942, 10673, 80380, 5914, 170575, 1026, 3600, 7040, 7186, 8440, 4860, 3108, 604, 100, 3575, 958, 1947, 30009, 5588, 3574, 388552, 6863, 10148, 3142, 3566, 5788, 4690
	GO:0015914~phospholipid transport	15	0.472441	0.000534672	0.0235303	148229, 9619, 19, 24, 336, 345, 337, 10079, 10396, 5027, 79895, 57198, 51761, 57194, 23250
	GO:0051336~regulation of hydrolase activity	82	2.58268	0.000568939	0.0247951	5330, 2147, 2149, 6772, 23232, 83874, 55081, 5371, 336, 337, 846, 9451, 10392, 7168, 54662, 80183, 22900, 221472, 9002, 2206, 604, 10062, 64744, 50861, 5604, 7409, 1901, 9815, 345, 1241, 9744, 1909, 27329, 55803, 2664, 55296, 2760, 55655, 6742, 79594, 135, 2168, 1956, 317, 10672, 1029, 1122, 4634, 7042, 729, 11033, 25771, 728, 374403, 51196, 27113, 58484, 4943, 4883, 114548, 22861, 392, 116986, 5…
	GO:0043549~regulation of kinase activity	86	2.70866	0.000578896	0.0249993	79706, 84634, 2149, 113, 6464, 6556, 3082, 5062, 55181, 2911, 154, 152, 6868, 8737, 51776, 1154, 8877, 2206, 5585, 2064, 5604, 5925, 4298, 207, 23162, 28988, 9064, 1852, 28984, 1909, 1616, 5027, 6879, 7436, 84335, 5934, 5314, 55704, 5788, 161742, 79594, 23636, 135, 920, 1435, 2357, 1956, 136, 1609, 3845, 1029, 1608, 1027, 1026, 1950, 7042, 7040, 728, 1030, 1031, 7186, 51196, 109, 5208, 8440, 7273…
	GO:0051347~positive regulation of transferase activity	62	1.95276	0.000595663	0.0254875	84634, 2149, 113, 6464, 6556, 3082, 2911, 154, 152, 6868, 8737, 51776, 1154, 8877, 2206, 5585, 2064, 5604, 207, 23162, 28988, 9064, 1909, 1616, 5027, 7436, 5314, 55704, 5788, 79594, 135, 920, 1435, 2357, 1956, 136, 1609, 3845, 1608, 1950, 7042, 7040, 728, 7186, 51196, 109, 5208, 7046, 7043, 3672, 29969, 796, 6997, 994, 7098, 5575, 25913, 894, 79444, 9463, 10451, 896
	GO:0043068~positive regulation of programmed cell death	101	3.1811	0.00063133	0.0267577	2643, 9459, 6772, 5371, 944, 154, 8739, 64393, 8737, 51776, 85329, 604, 7409, 4118, 207, 79156, 1616, 5027, 2021, 1613, 7204, 79594, 318, 2071, 1843, 7042, 729, 7040, 7186, 27113, 7421, 10013, 58484, 7046, 8445, 84883, 114548, 7043, 220, 695, 22861, 393, 914, 5340, 7052, 10285, 26471, 203068, 3428, 23385, 56253, 841, 148022, 3827, 57580, 3624, 1051, 10392, 8772, 83941, 221472, 5326, 5601, 2903, 6…
	GO:0005975~carbohydrate metabolic process	120	3.77953	0.000658199	0.0276397	79709, 8534, 5373, 10993, 170384, 84002, 2296, 2203, 8871, 4199, 3098, 5223, 29988, 55753, 79153, 51363, 207, 26007, 414328, 27329, 79158, 79690, 2760, 8869, 5214, 23127, 920, 346606, 64131, 283209, 5256, 64132, 133584, 3029, 6185, 3948, 3699, 3697, 55526, 201595, 3945, 23729, 226, 229, 51181, 2590, 7915, 27294, 9761, 3939, 81544, 9032, 6482, 2821, 6489, 4351, 89792, 11227, 9514, 2583, 11253, 281…
	GO:0051495~positive regulation of cytoskeleton organization	18	0.566929	0.0007144	0.0297082	84722, 84634, 5588, 858, 857, 1027, 5341, 5027, 7168, 6863, 10096, 8440, 11346, 10300, 136991, 10109, 4131, 4690
	GO:0010942~positive regulation of cell death	101	3.1811	0.000734238	0.0302617	2643, 9459, 6772, 5371, 944, 154, 8739, 64393, 8737, 51776, 85329, 604, 7409, 4118, 207, 79156, 1616, 5027, 2021, 1613, 7204, 79594, 318, 2071, 1843, 7042, 729, 7040, 7186, 27113, 7421, 10013, 58484, 7046, 8445, 84883, 114548, 7043, 220, 695, 22861, 393, 914, 5340, 7052, 10285, 26471, 203068, 3428, 23385, 56253, 841, 148022, 3827, 57580, 3624, 1051, 10392, 8772, 83941, 221472, 5326, 5601, 2903, 6…
	GO:0016265~death	157	4.94488	0.000740202	0.0302471	4208, 4209, 2147, 4205, 55840, 2149, 6772, 9459, 3875, 330, 5371, 8744, 9451, 9450, 8739, 80208, 64393, 51776, 4929, 8737, 22900, 85329, 23645, 7409, 79152, 207, 22985, 8682, 5552, 79156, 5551, 5027, 1616, 929, 10913, 4893, 51765, 8312, 26353, 2021, 64400, 55655, 1613, 7204, 79594, 23636, 2620, 23531, 317, 3845, 922, 7042, 729, 7188, 7040, 7186, 27113, 81566, 9197, 58484, 6478, 8445, 84883, 26999…
	GO:0008219~cell death	156	4.91339	0.000753882	0.0305406	4208, 4209, 2147, 4205, 55840, 2149, 6772, 9459, 3875, 330, 5371, 8744, 9451, 9450, 8739, 80208, 64393, 51776, 8737, 22900, 85329, 23645, 7409, 79152, 207, 22985, 8682, 5552, 79156, 5551, 5027, 1616, 929, 10913, 4893, 51765, 8312, 26353, 2021, 64400, 55655, 1613, 7204, 79594, 23636, 2620, 23531, 317, 3845, 922, 7042, 729, 7188, 7040, 7186, 27113, 81566, 9197, 58484, 6478, 8445, 84883, 26999, 3744…
	GO:0045859~regulation of protein kinase activity	83	2.61417	0.000757858	0.0304452	79706, 84634, 2149, 113, 6464, 6556, 3082, 5062, 55181, 2911, 154, 152, 6868, 8737, 51776, 1154, 8877, 2206, 5585, 2064, 5604, 5925, 4298, 207, 23162, 28988, 9064, 1852, 28984, 1909, 1616, 5027, 6879, 7436, 84335, 5314, 55704, 5788, 161742, 79594, 23636, 135, 920, 1435, 2357, 1956, 136, 1609, 3845, 1029, 1608, 1027, 1026, 1950, 7042, 7040, 728, 1030, 1031, 7186, 51196, 109, 8440, 7273, 9479, 7046…
	GO:0065009~regulation of molecular function	203	6.3937	0.000818588	0.0325762	8881, 79706, 6772, 3082, 5371, 10203, 949, 336, 337, 154, 152, 153, 6868, 7168, 8737, 51776, 10487, 22900, 8877, 2206, 604, 5744, 345, 207, 6879, 1594, 2847, 55655, 161742, 6604, 23636, 6752, 920, 1435, 317, 2316, 3845, 7042, 4634, 729, 25771, 7040, 728, 7186, 51196, 8440, 58484, 7046, 7043, 55738, 229, 23624, 5341, 23527, 7321, 7052, 25913, 23385, 115727, 79444, 23102, 5330, 113, 59307, 23232, 8…
	GO:0010740~positive regulation of protein kinase cascade	46	1.44882	0.000819615	0.0323513	23636, 841, 148022, 2149, 7105, 2316, 5008, 847, 51026, 154, 2697, 7042, 7188, 7040, 10392, 8772, 8737, 7046, 8717, 958, 2064, 1893, 3059, 27032, 23542, 64127, 834, 5467, 7132, 10769, 5027, 10475, 3162, 3956, 2280, 7052, 7098, 3976, 7099, 8312, 60401, 4067, 10783, 5788, 3589, 79594
	GO:0051130~positive regulation of cellular component organization	49	1.54331	0.000820966	0.0321425	84634, 1002, 6556, 10580, 5371, 64581, 9700, 7168, 10300, 79006, 9253, 5588, 5792, 6092, 207, 5364, 5037, 4747, 51330, 5027, 10096, 10109, 4690, 967, 867, 1027, 1786, 1950, 7042, 7041, 3984, 7040, 10013, 8440, 11346, 5806, 7046, 4131, 7043, 84722, 811, 5898, 858, 857, 5341, 6863, 9138, 25913, 136991
	GO:0030154~cell differentiation	326	10.2677	0.000889611	0.0345061	4208, 4209, 3087, 4205, 3082, 2335, 64395, 34, 5371, 7348, 5376, 154, 153, 8320, 6868, 7168, 51176, 51776, 604, 5228, 6493, 5744, 6092, 2016, 3299, 4118, 5364, 207, 5367, 1591, 83605, 4893, 10096, 8312, 51167, 3915, 7076, 3910, 3911, 4791, 55558, 6604, 10320, 825, 920, 1435, 162394, 170575, 3845, 84498, 8038, 150465, 7042, 7041, 7040, 57619, 1840, 627, 51294, 7046, 65078, 3730, 811, 1306, 1464, 5…
	GO:0009991~response to extracellular stimulus	57	1.79528	0.000939299	0.0361106	240, 2642, 6772, 5914, 6423, 9140, 8739, 3485, 4929, 79602, 249, 6648, 207, 4982, 5027, 1594, 6198, 1591, 7436, 440, 1277, 6752, 133, 136, 2934, 960, 8614, 1026, 3992, 1603, 360, 1843, 7040, 1030, 7421, 558, 10013, 340024, 3077, 4131, 4232, 594, 5154, 81788, 229, 54600, 857, 655, 2180, 3162, 8473, 3939, 2538, 359, 115727, 8435, 4067
	GO:0031110~regulation of microtubule polymerization or depolymerization	14	0.440945	0.000959607	0.0365875	84722, 858, 1027, 857, 51119, 79929, 10013, 10300, 136991, 4133, 4130, 4131, 4281, 57159
	GO:0042127~regulation of cell proliferation	168	5.29134	0.00101668	0.0384206	7535, 1003, 3087, 2149, 942, 6772, 80380, 5371, 10203, 146433, 5376, 154, 4613, 6868, 10135, 8877, 3200, 604, 5228, 11326, 5744, 2014, 5742, 1901, 7940, 3299, 1909, 1594, 3688, 4893, 4601, 3915, 9537, 10148, 51761, 3142, 7076, 3911, 4690, 6752, 23636, 7518, 1435, 2168, 10673, 928, 3845, 6678, 57804, 7042, 7041, 7188, 7040, 7421, 7424, 7423, 8440, 627, 7046, 102, 412, 5967, 100, 7043, 9231, 811, 3…
	GO:0030334~regulation of cell migration	46	1.44882	0.00107188	0.0401529	1435, 84634, 51225, 2149, 1956, 4542, 10672, 5080, 949, 3909, 7042, 6237, 7040, 7168, 6868, 7424, 10013, 8877, 5797, 2150, 102, 100, 91624, 5154, 54567, 5604, 22846, 9734, 3791, 1901, 6997, 26585, 207, 1012, 54521, 350, 5340, 27329, 3162, 6198, 6863, 3910, 55615, 3911, 58191, 5594
	GO:0006952~defense response	135	4.25197	0.00107843	0.0400843	10344, 2147, 2643, 4046, 2149, 6556, 8534, 2335, 10695, 3683, 336, 337, 27063, 9450, 6351, 3929, 1524, 55540, 2209, 2206, 6614, 11326, 2157, 23780, 3135, 4688, 930, 8111, 64127, 207, 6362, 5551, 5027, 1594, 929, 3688, 1511, 10871, 2625, 317, 6891, 6890, 2268, 922, 729, 7040, 728, 58484, 5806, 23586, 11343, 114548, 22861, 10312, 79132, 9235, 912, 340061, 11025, 713, 712, 715, 26471, 7534, 203068, …
	GO:0030155~regulation of cell adhesion	39	1.22835	0.00112729	0.0415451	136227, 1435, 133584, 9267, 2934, 1295, 4542, 3827, 1029, 3909, 948, 7042, 7448, 7040, 7168, 10085, 2246, 9595, 151887, 102, 7045, 604, 6494, 100, 3576, 2064, 5604, 7409, 1901, 6997, 1012, 5921, 7052, 4811, 1277, 3910, 397, 3911, 10451
	GO:0012501~programmed cell death	134	4.22047	0.00116342	0.0425259	4208, 4209, 2147, 4205, 2149, 55840, 6772, 9459, 3875, 330, 8744, 5371, 9451, 9450, 8739, 64393, 8737, 22900, 85329, 23645, 7409, 207, 22985, 8682, 5552, 79156, 5551, 1616, 929, 10913, 4893, 51765, 8312, 2021, 64400, 55655, 1613, 7204, 79594, 2620, 317, 3845, 922, 729, 7188, 7186, 27113, 81566, 58484, 6478, 8445, 84883, 26999, 114548, 374407, 5153, 8565, 22861, 393, 55201, 1777, 340061, 5340, 183…
	GO:0044271~nitrogen compound biosynthetic process	78	2.45669	0.00118716	0.0430511	148229, 10243, 113451, 2643, 113, 158, 489, 10396, 488, 8833, 93100, 4929, 10135, 4860, 26227, 4199, 55224, 635, 27032, 9914, 270, 55191, 207, 50617, 79814, 3614, 4552, 479, 51816, 4833, 445, 5832, 440, 23475, 79895, 11240, 51761, 586, 2982, 135, 51557, 133, 210, 55312, 1371, 155066, 6240, 5351, 58510, 7042, 7040, 6470, 109, 245972, 57198, 1644, 57194, 23250, 100, 377841, 514, 5860, 554235, 10312…
	GO:0048869~cellular developmental process	337	10.6142	0.00124401	0.0447333	4208, 4209, 3087, 4205, 3082, 2335, 64395, 34, 5371, 7348, 5376, 154, 153, 8320, 6351, 6868, 7168, 51176, 51776, 10487, 604, 5228, 6493, 5744, 6092, 2016, 3299, 4118, 207, 5364, 5367, 1591, 83605, 4893, 10096, 8312, 51167, 3915, 7076, 3910, 3911, 4791, 55558, 6604, 10320, 825, 920, 1435, 162394, 170575, 928, 3845, 84498, 8038, 150465, 7042, 7041, 7040, 57619, 1840, 627, 51294, 7046, 65078, 3730, …
	GO:0051338~regulation of transferase activity	87	2.74016	0.00140074	0.0498612	79706, 84634, 2149, 113, 6464, 6556, 3082, 5062, 55181, 2911, 154, 152, 6868, 8737, 51776, 1154, 8877, 2206, 5585, 2064, 5604, 5925, 4298, 23162, 207, 28988, 9064, 1852, 28984, 1909, 1616, 5027, 6879, 7436, 84335, 5934, 5314, 55704, 5788, 161742, 79594, 23636, 135, 920, 1435, 2357, 1956, 136, 1609, 3845, 1029, 1608, 1027, 1026, 1950, 7042, 7040, 728, 1030, 1031, 7186, 51196, 109, 5208, 8440, 7273…
a Gene sets used for biological process analysis, “BTK” (bladder, testis and kidney) represents gene set deregulated uniformly in all of the three cancers; “BT” represents gene set deregulated uniformly in TCC and TGCT; “TK” represents gene set deregulated uniformly in TGCT and ccRCC; “BK” gene set deregulated uniformly in TCC and ccRCC; While TCC, TGCT and ccRCC gene set deregulated solely in co…
b Count of differentially expressed genes implicated in corresponding pathway.
c Percentage of differentially expressed genes versus all genes in the pathway.
d Gene ID of all the deregulated genes implicated in corresponding pathway.
